# Supplementary material
Source: PubMed Central journal article supplement (PMC8567247)

WA\_Scaffold581519602\_67268

Length: 67,268

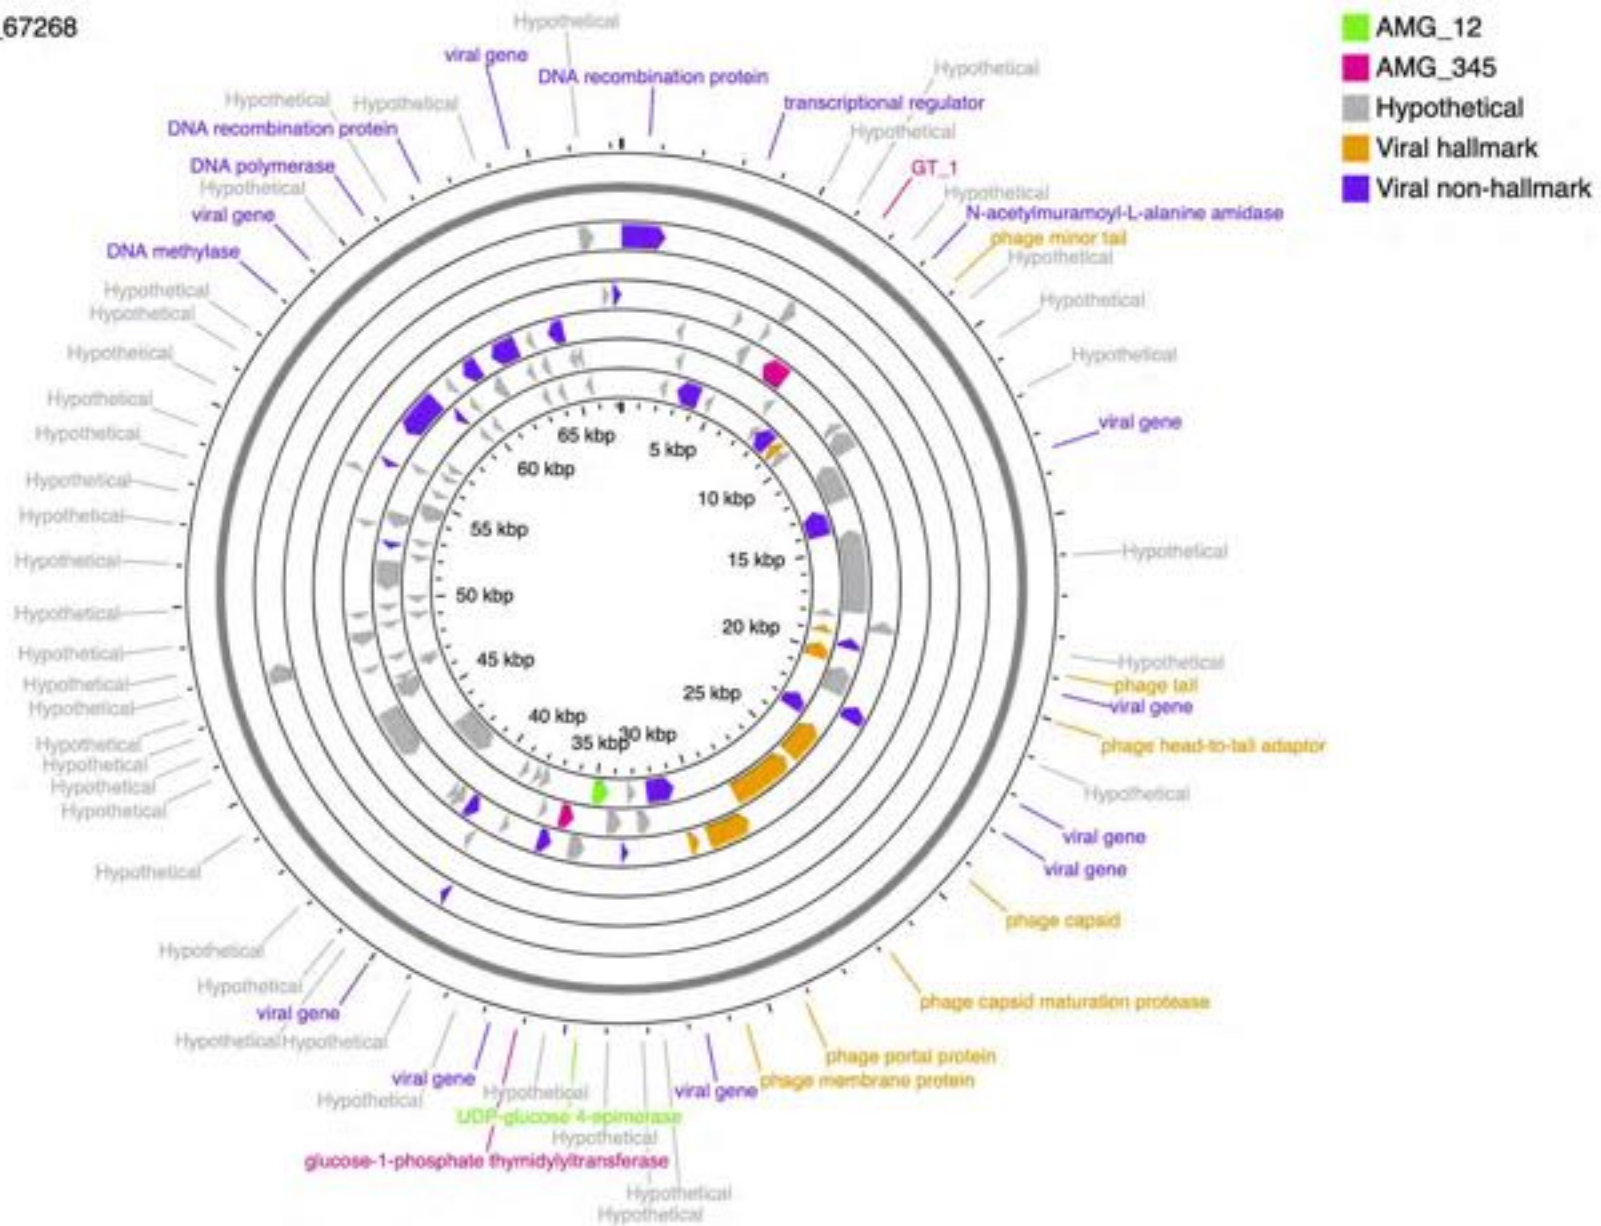

WA\_Scaffold578402105\_68441  
Length:68,441

- AMG\_12
- AMG\_345
- Hypothetical
- Viral hallmark
- Viral non-hallmark

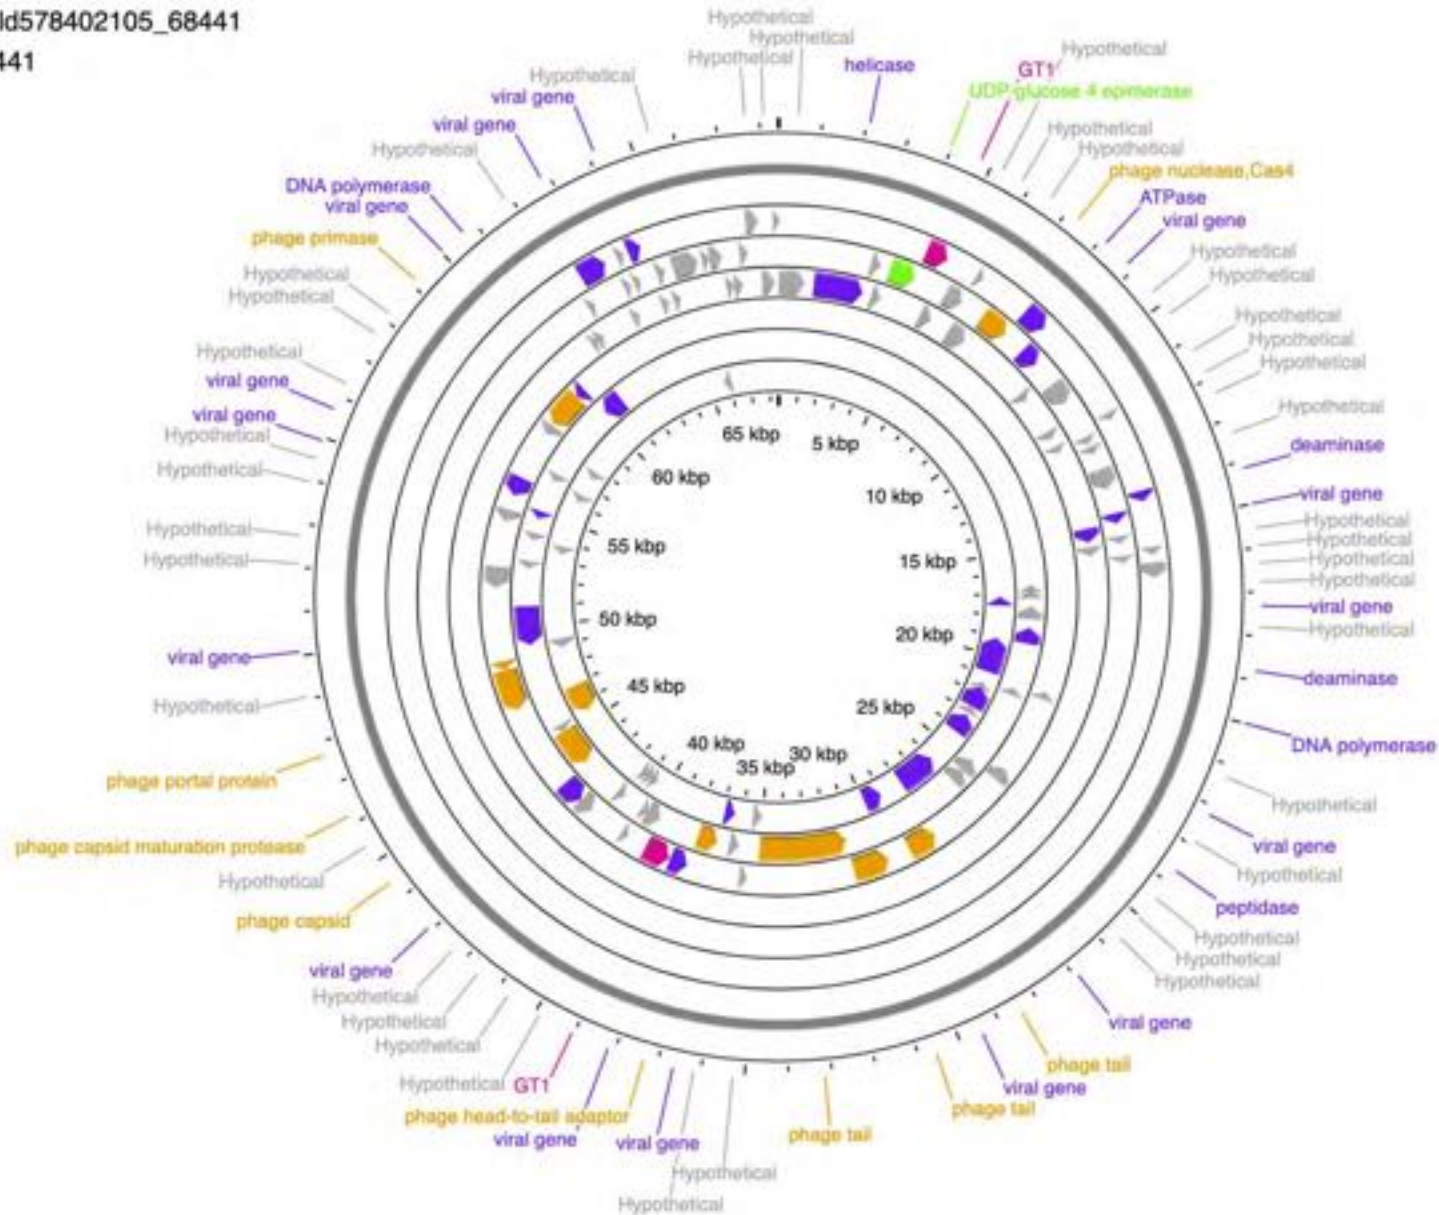

WA\_Scaffold565689445\_68278  
Length:68,278

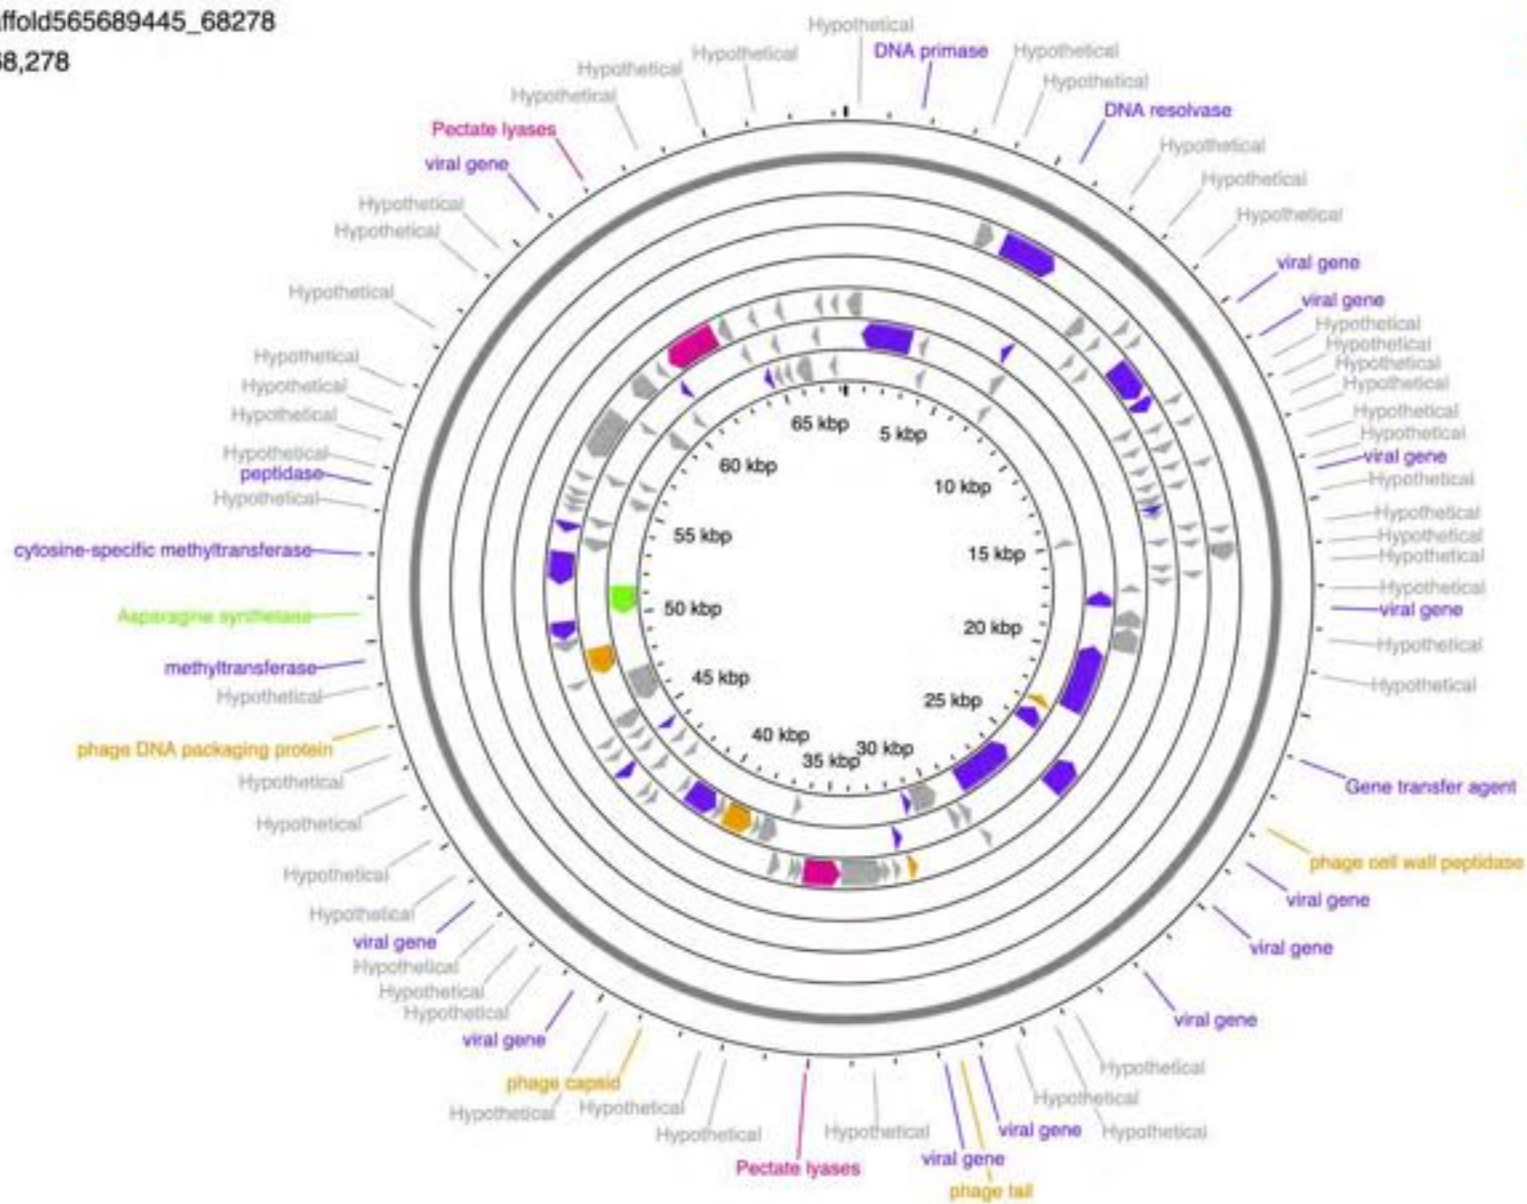

- AMG\_12
- AMG\_345
- Hypothetical
- Viral hallmark
- Viral non-hallmark

WA\_Scaffold504432384\_94244  
Length: 94,244

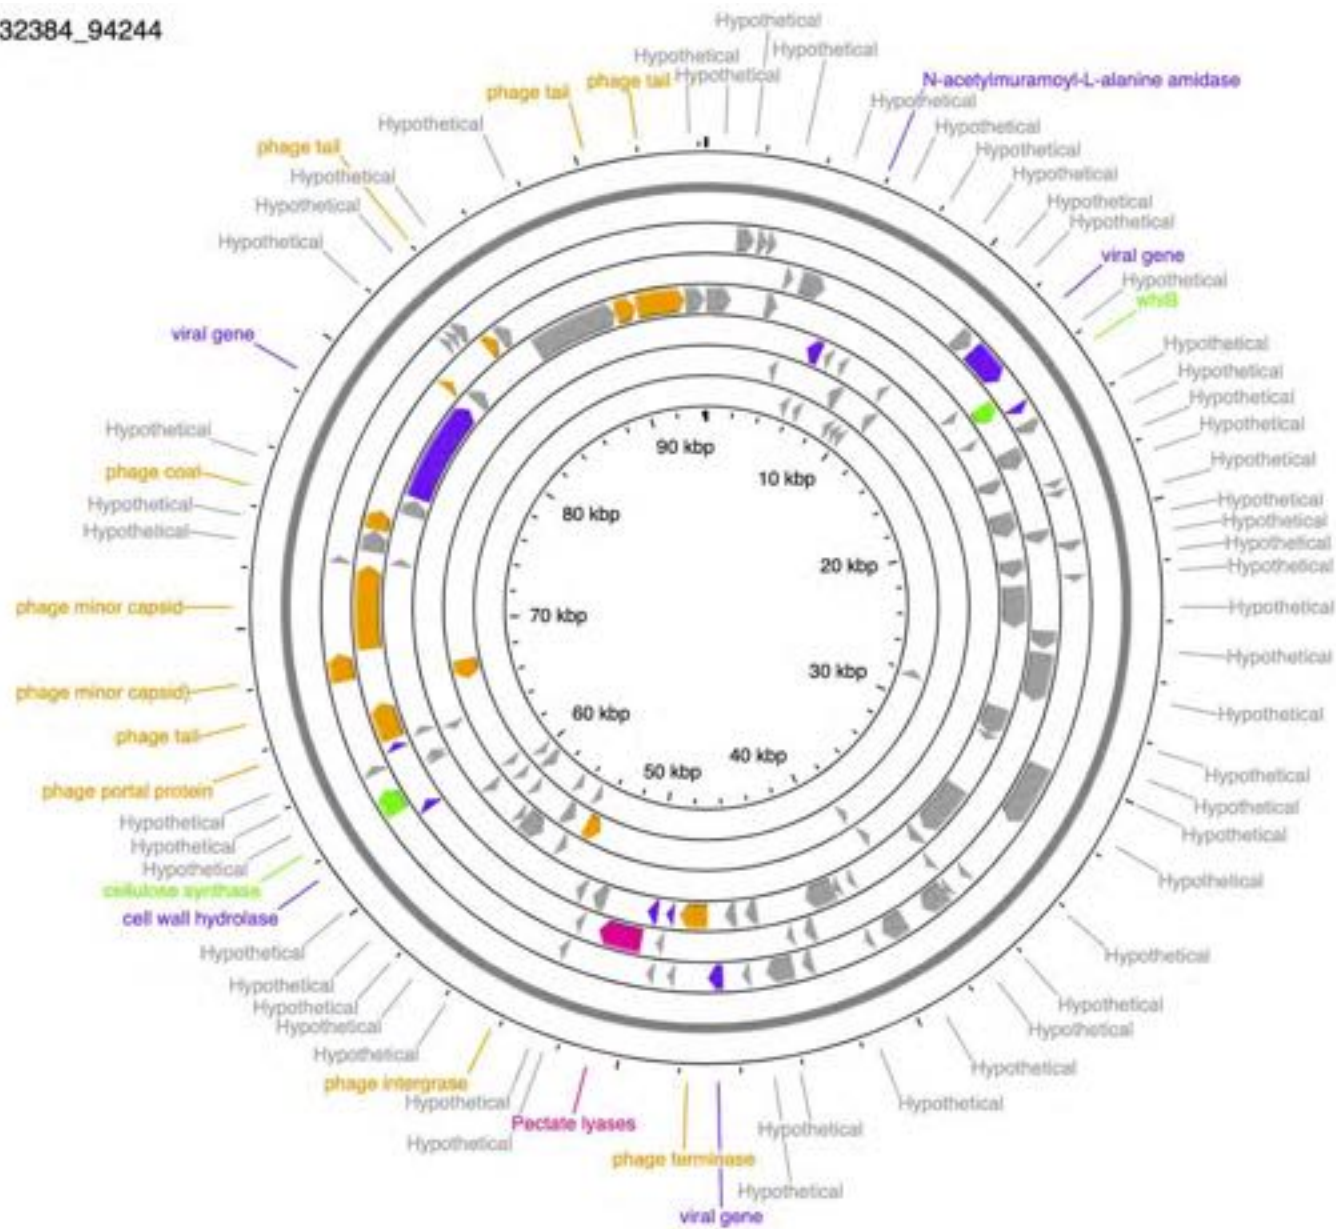

- AMG\_12
- AMG\_345
- Hypothetical
- Viral hallmark
- Viral non-hallmark

WA\_Scaffold465127916\_105970

Length: 105,970

- AMG\_12
- AMG\_345
- Hypothetical
- Viral hallmark
- Viral non-hallmark

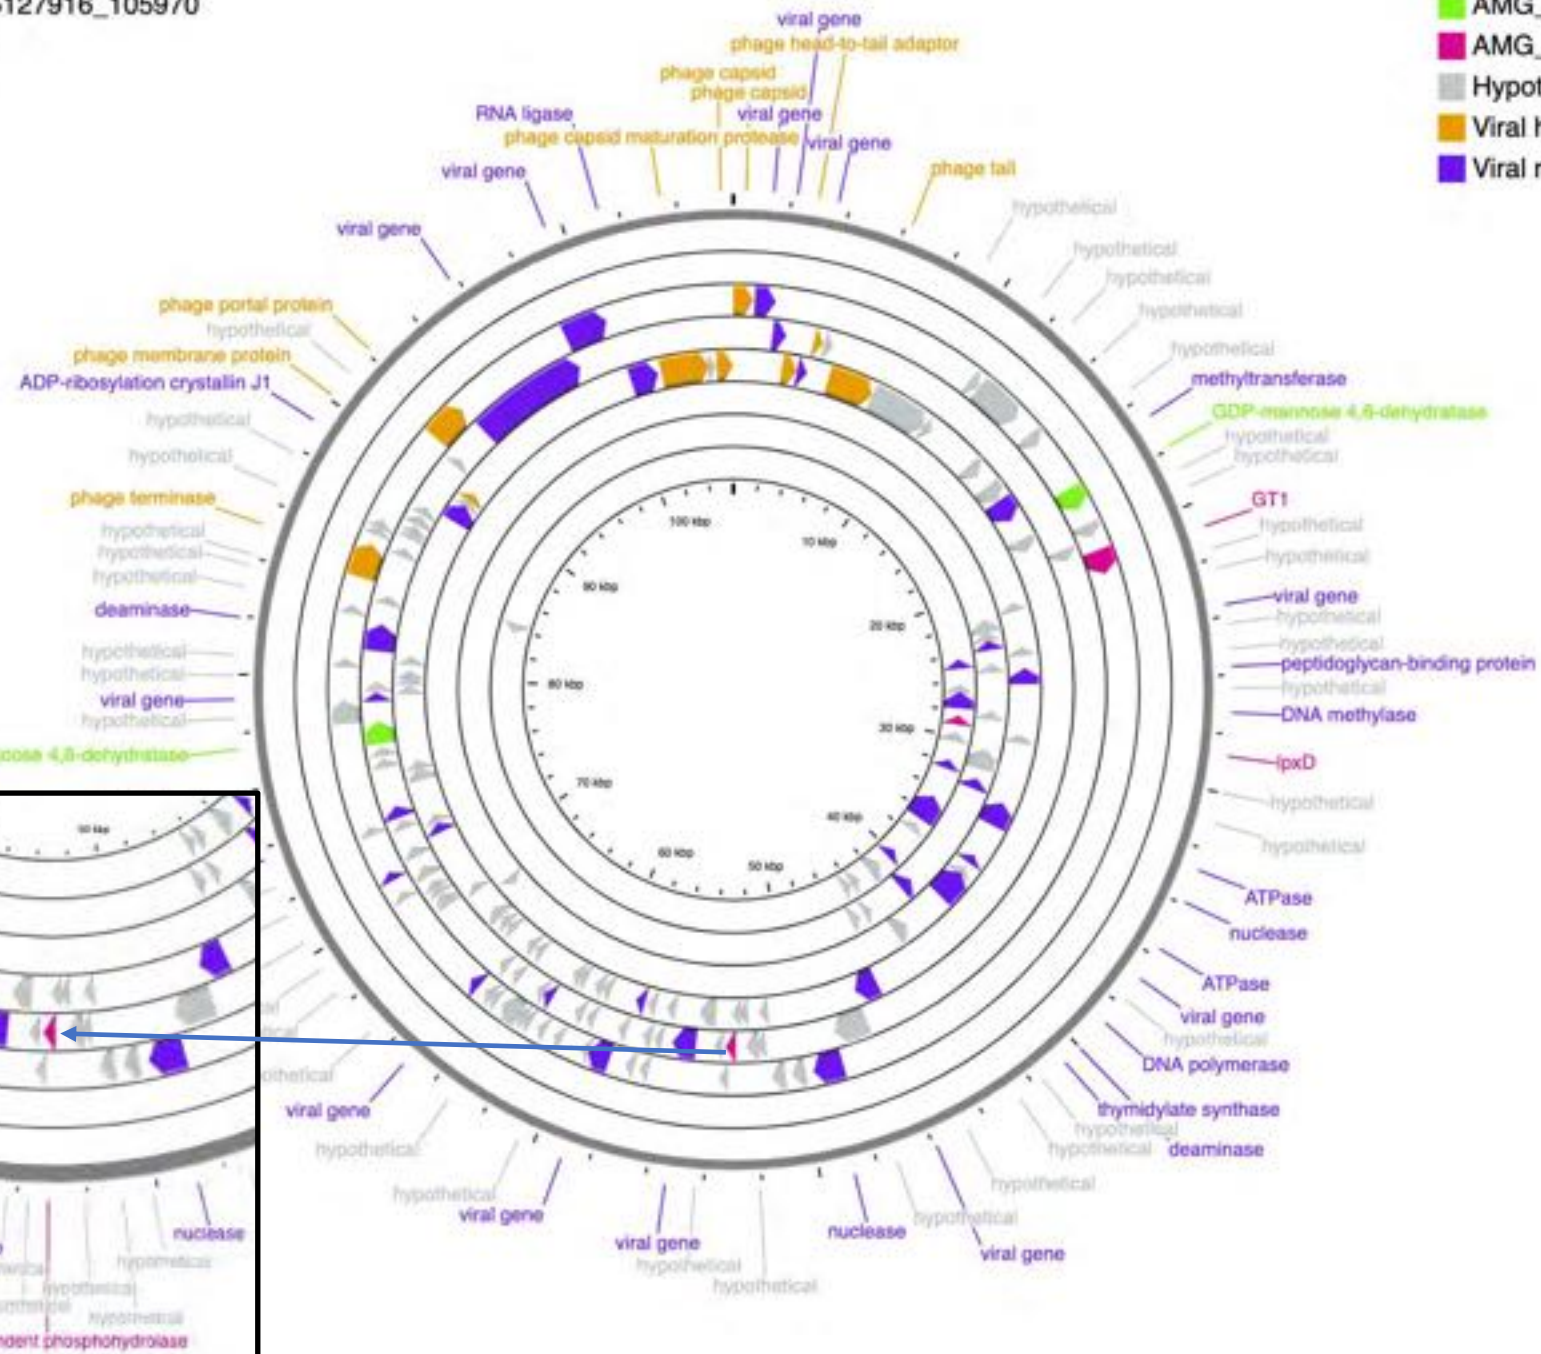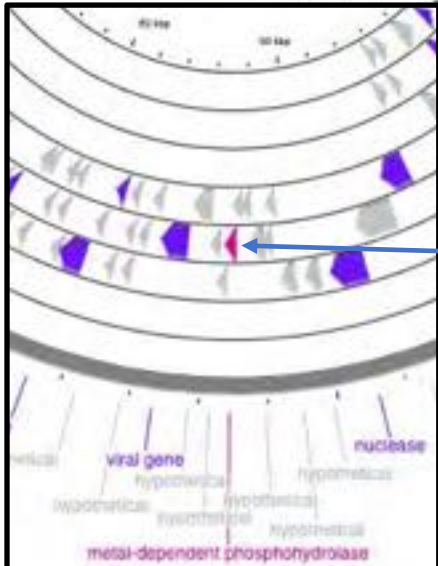

WA\_Scaffold457840178\_46883

Length: 46,883

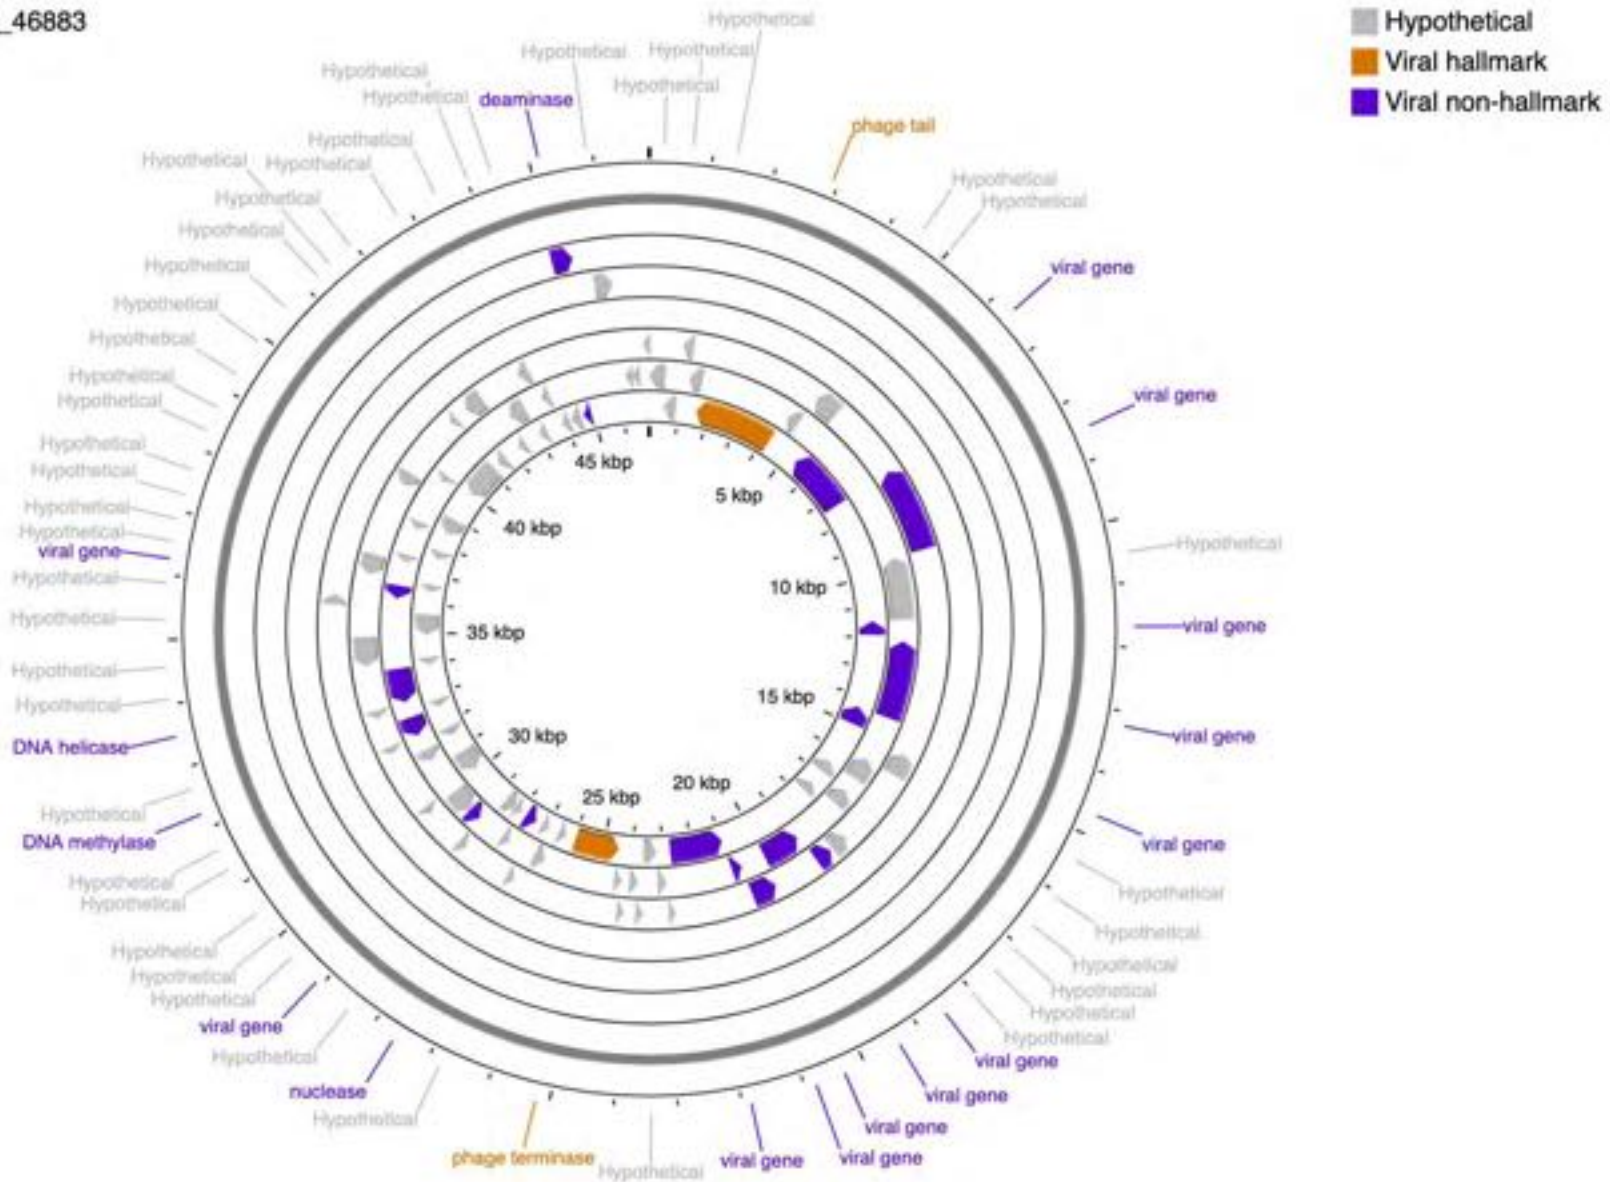

WA\_Scaffold449340353\_220911  
Length: 220,911

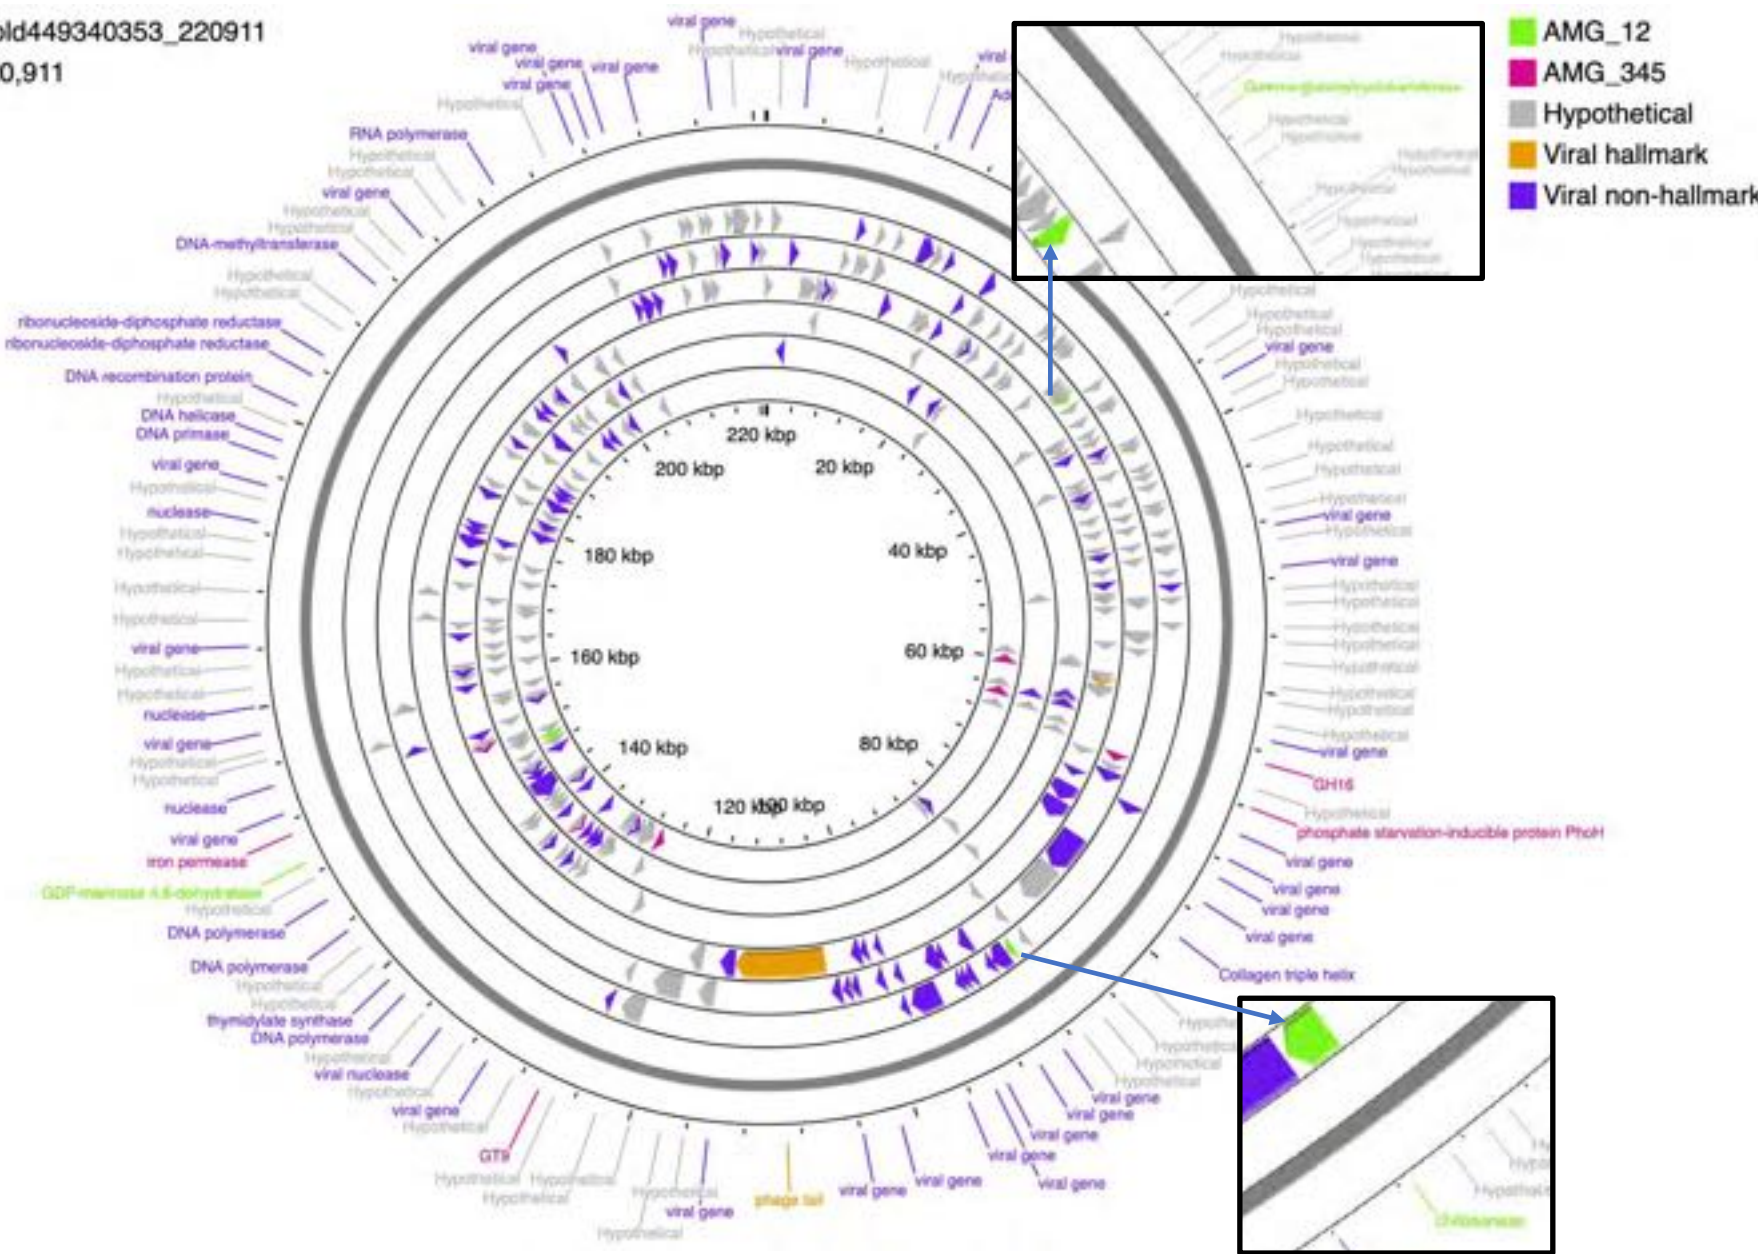

- AMG\_12
- AMG\_345
- Hypothetical
- Viral hallmark
- Viral non-hallmark



WA\_Scaffold380765304\_77941  
Length: 77,941

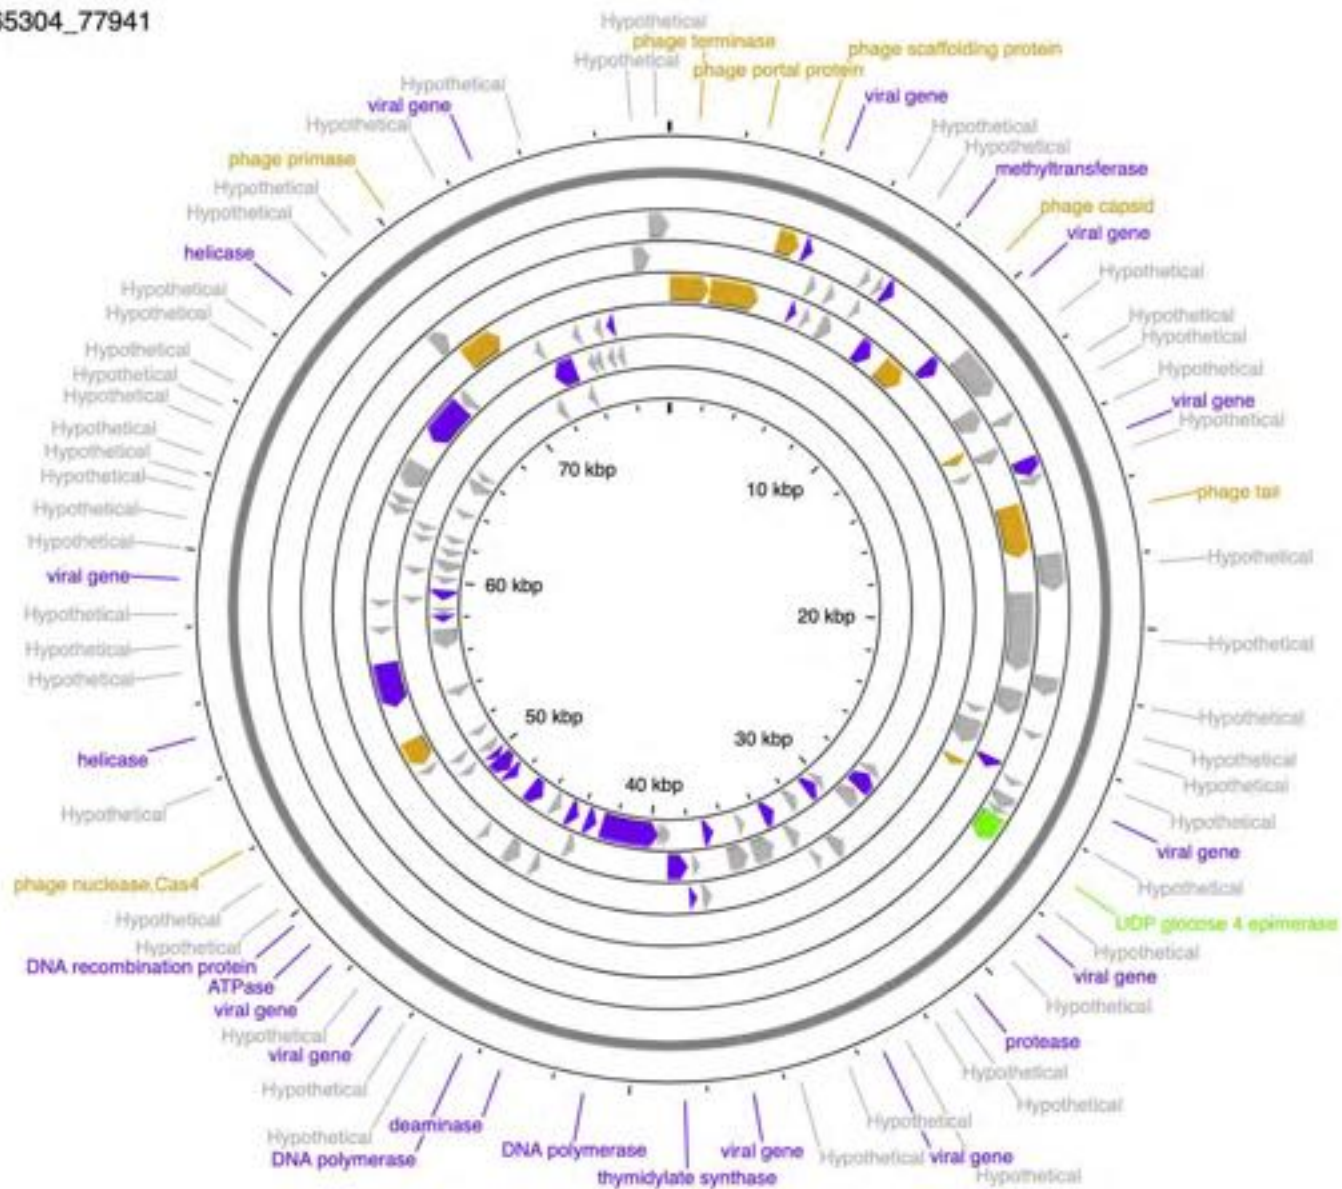

- AMG\_12
- Hypothetical
- Viral hallmark
- Viral non-hallmark

WA\_Scaffold351430428\_114648  
Length: 114,648

- AMG\_12
- AMG\_345
- Hypothetical
- Viral hallmark
- Viral non-hallmark

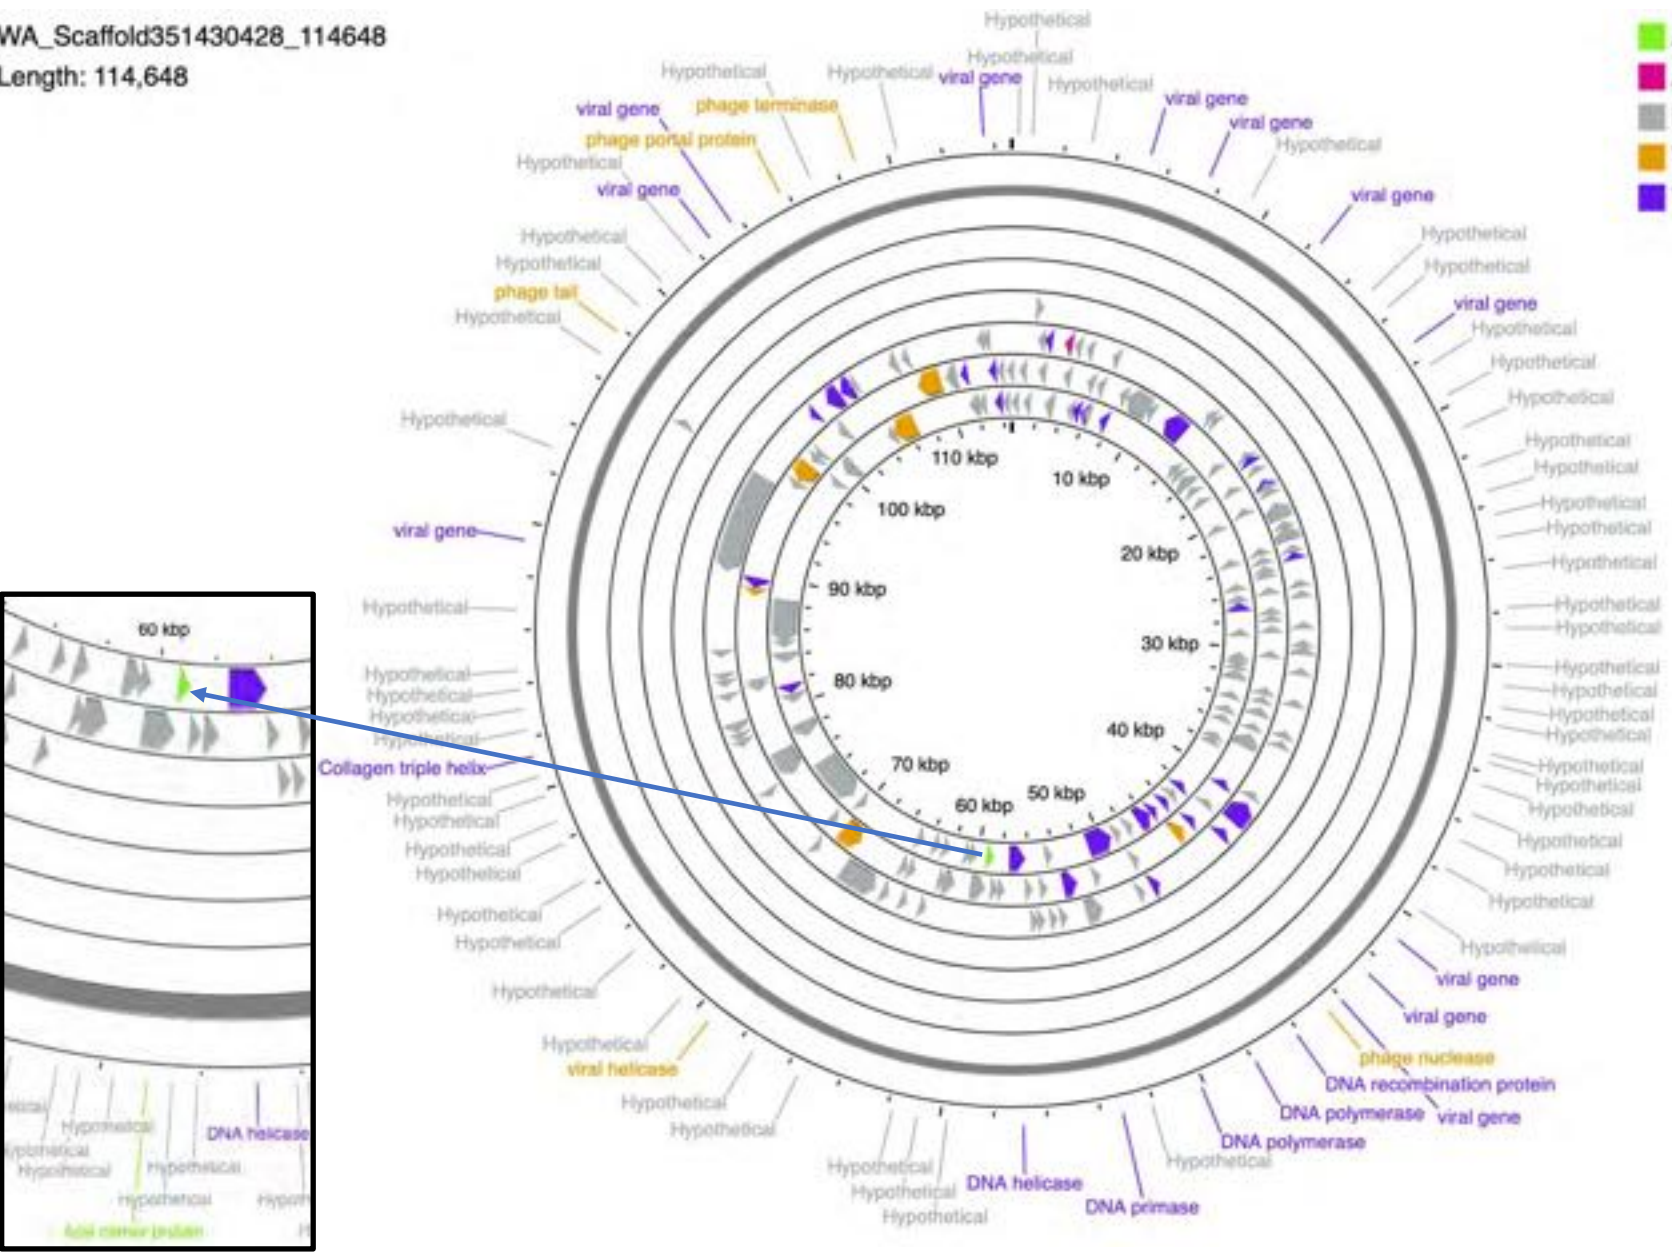

Collagen triple helix

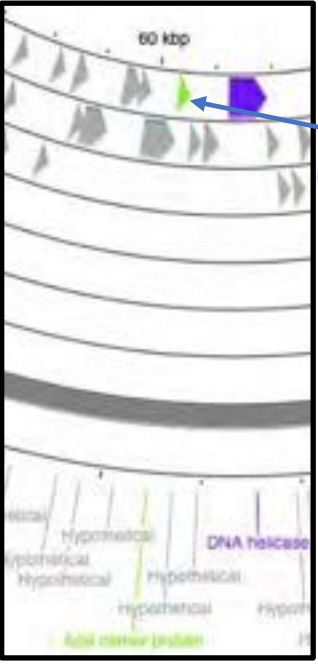

WA\_Scaffold292368993\_92346

Length: 92,346

- AMG\_12
- Hypothetical
- Viral hallmark
- Viral non-hallmark

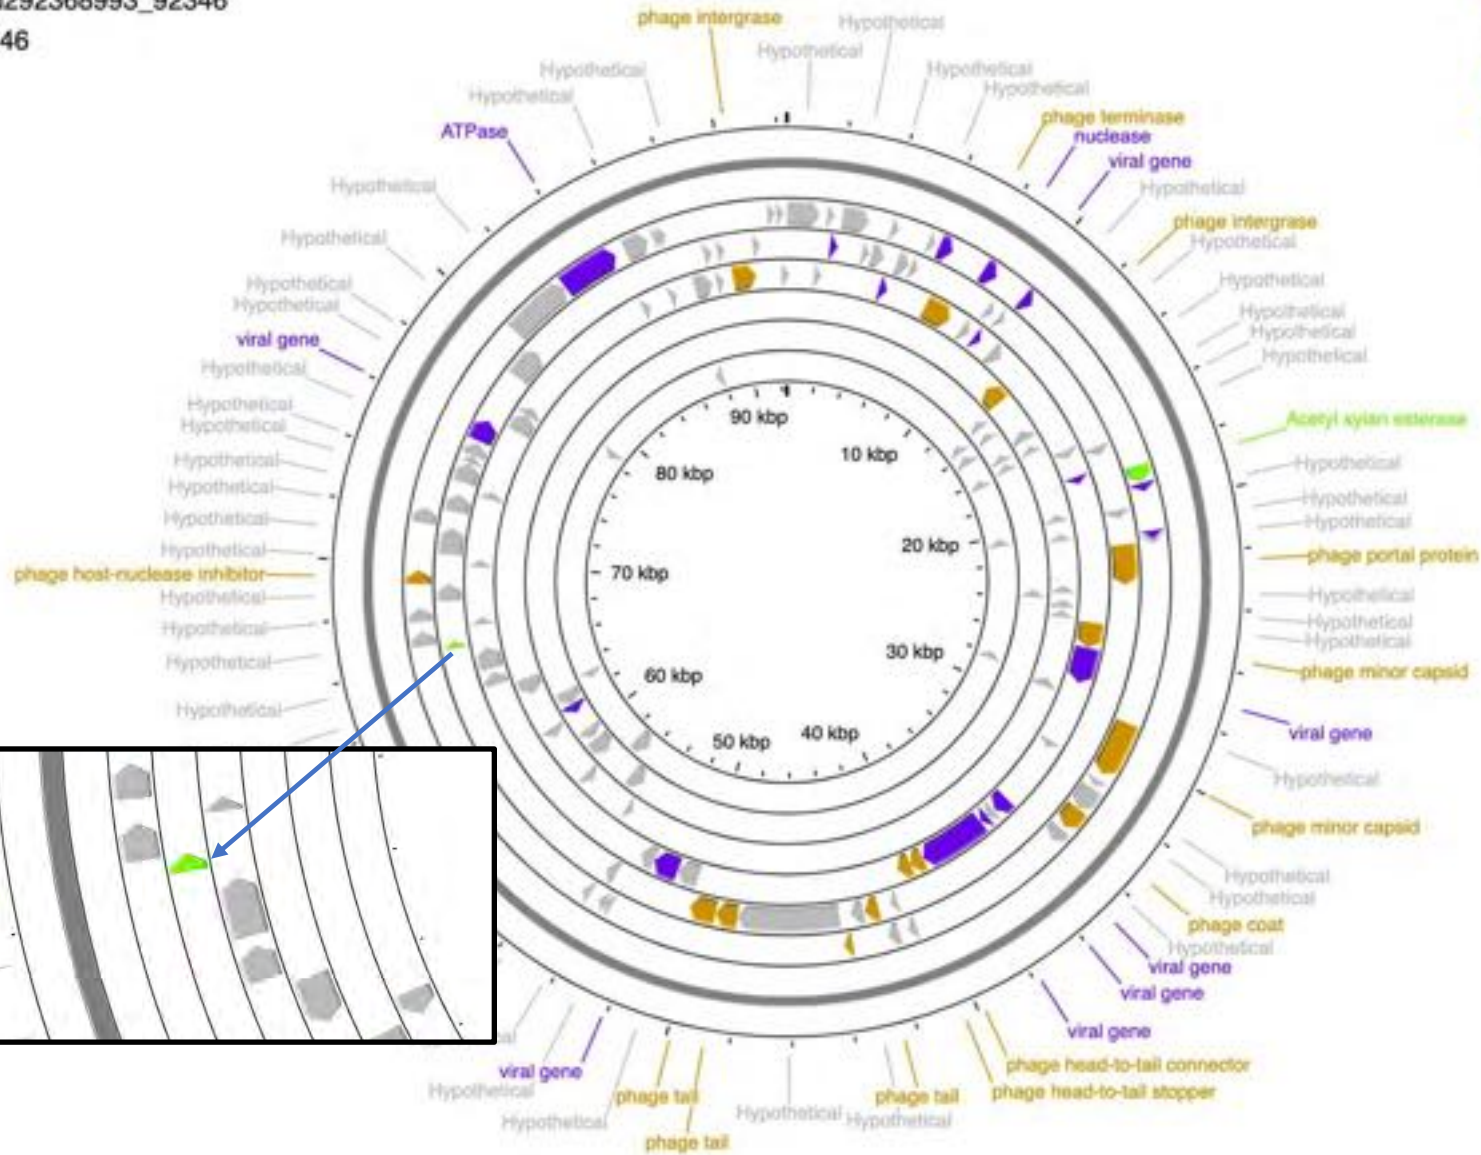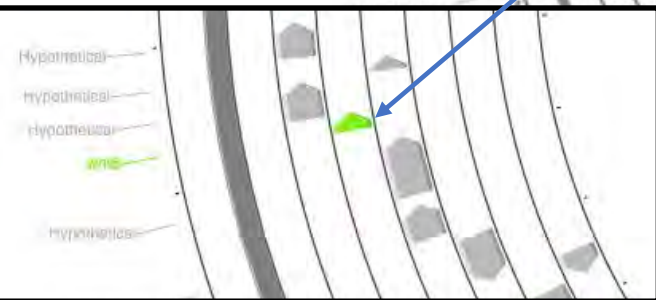

WA\_Scaffold138375052\_106527

Length: 106,527

- Hypothetical
- Viral hallmark
- Viral non-hallmark

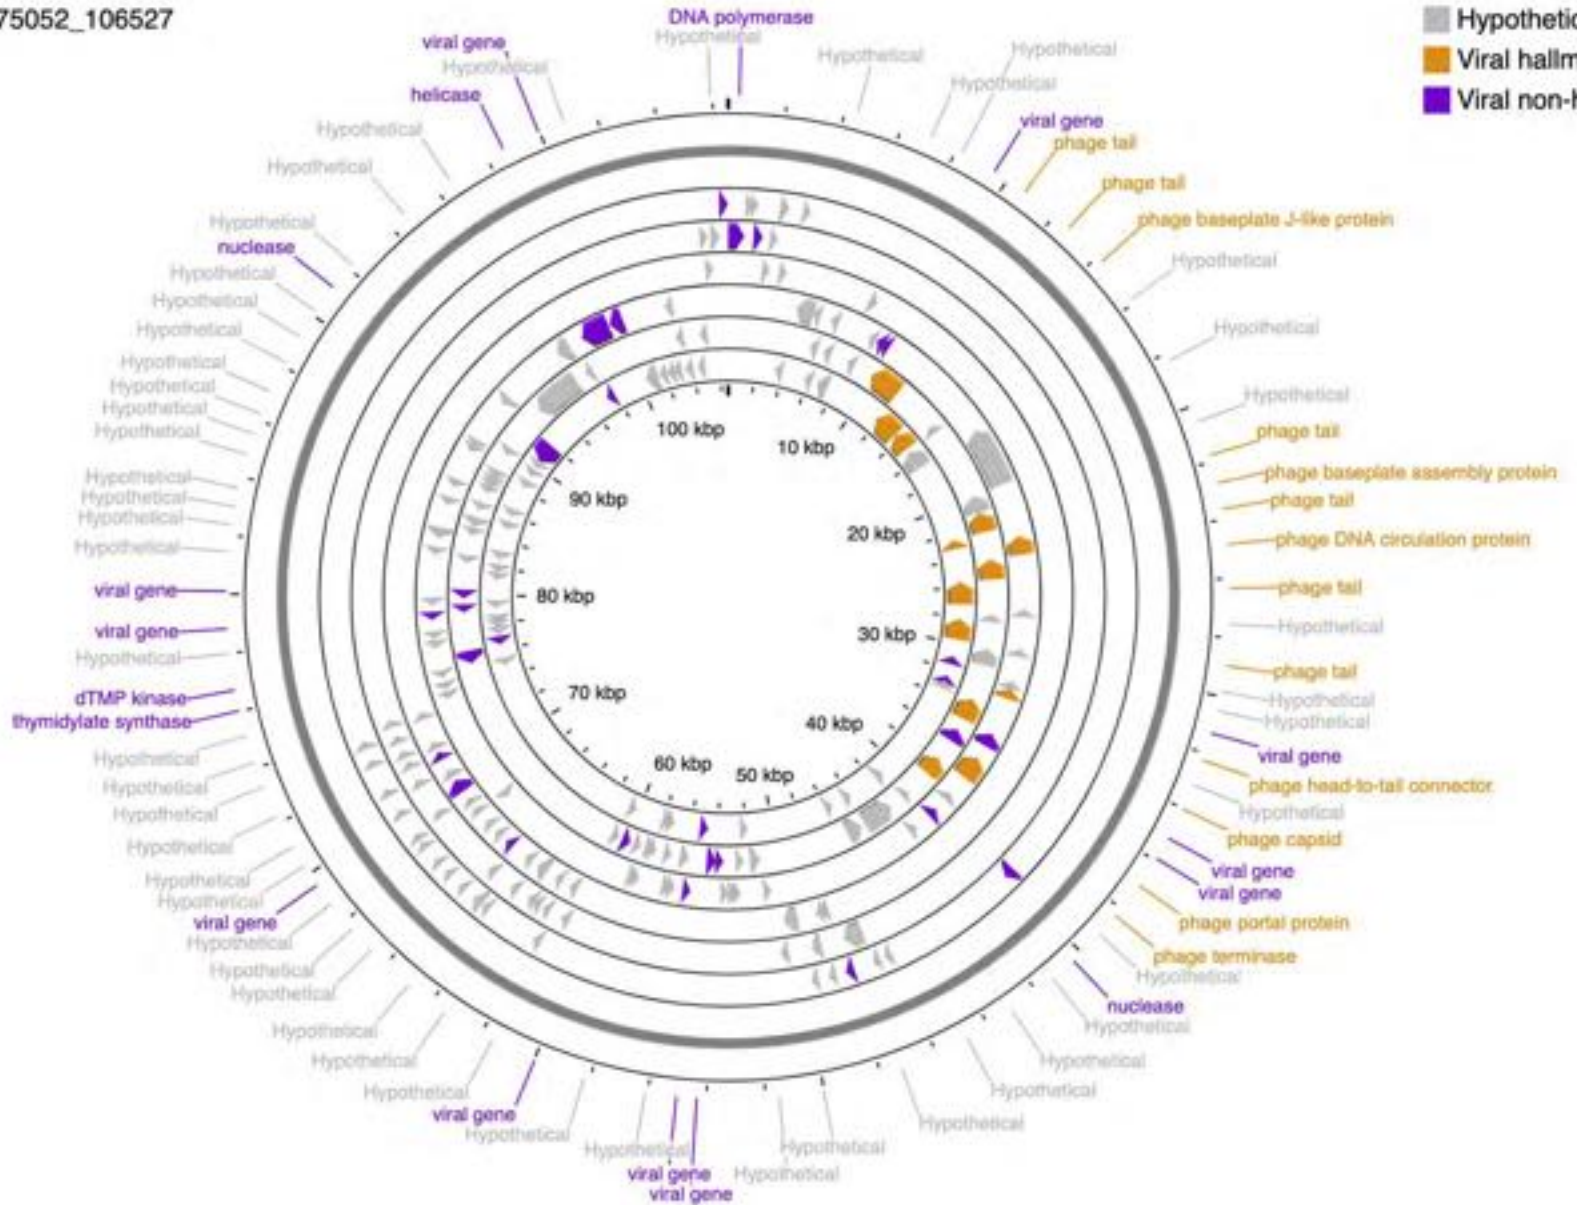

WA\_Scaffold137766301\_60038  
Length: 60,038

■ Hypothetical  
■ Viral hallmark  
■ Viral non-hallmark

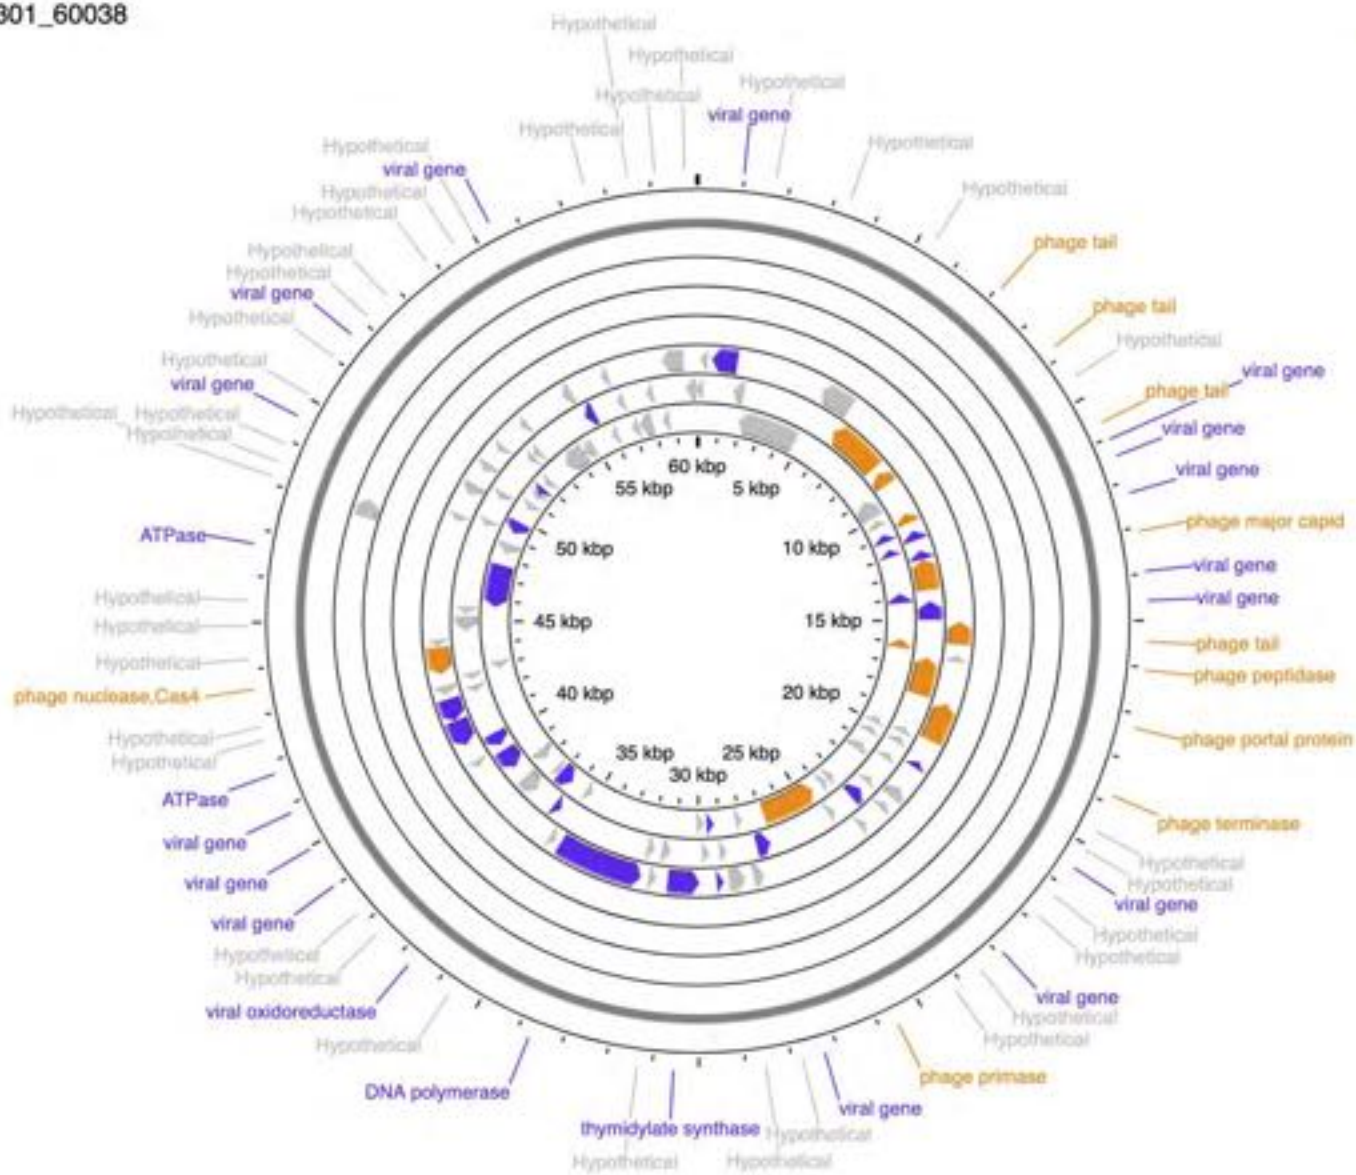

Kansas\_Scaffold251053072\_61573

Length: 61,573

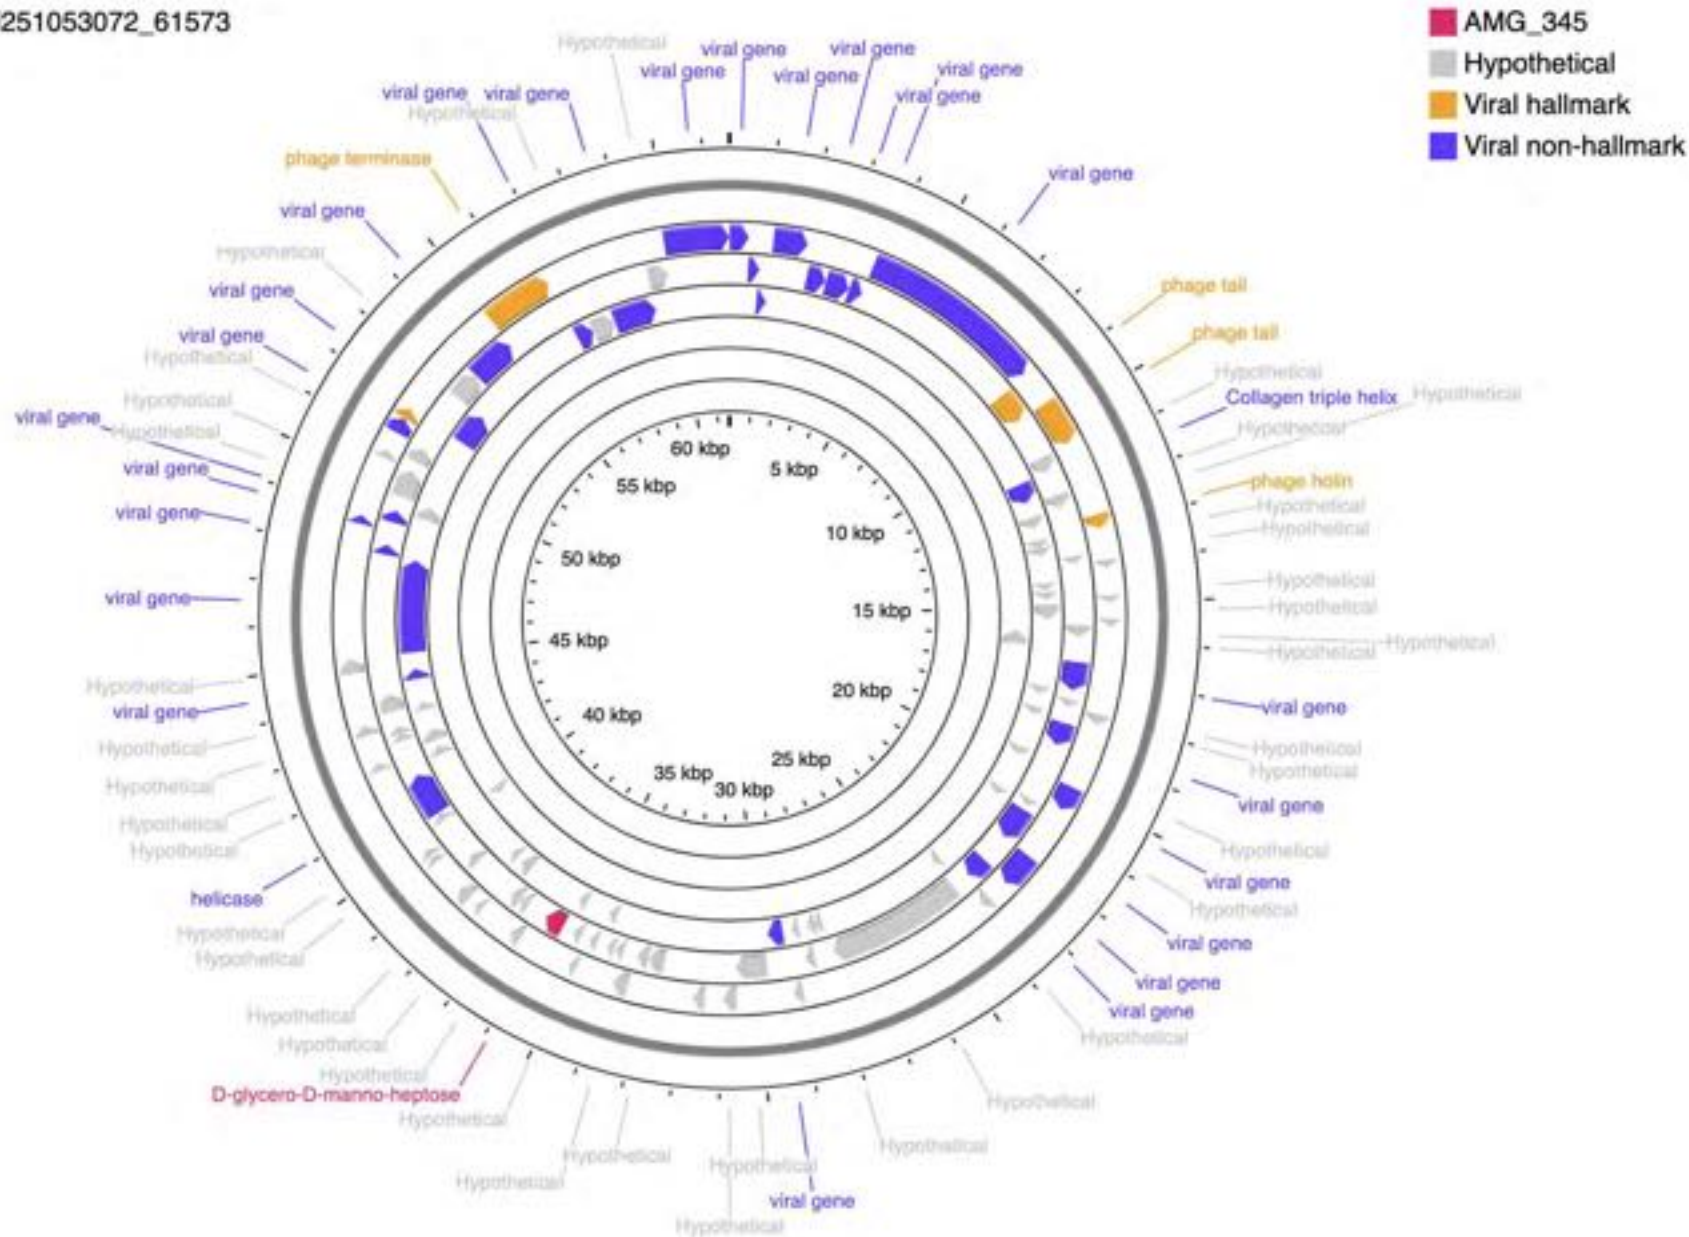

Kansas\_Scaffold105098385\_43300  
Length: 43,300

■ Hypothetical  
■ Viral hallmark  
■ Viral non-hallmark

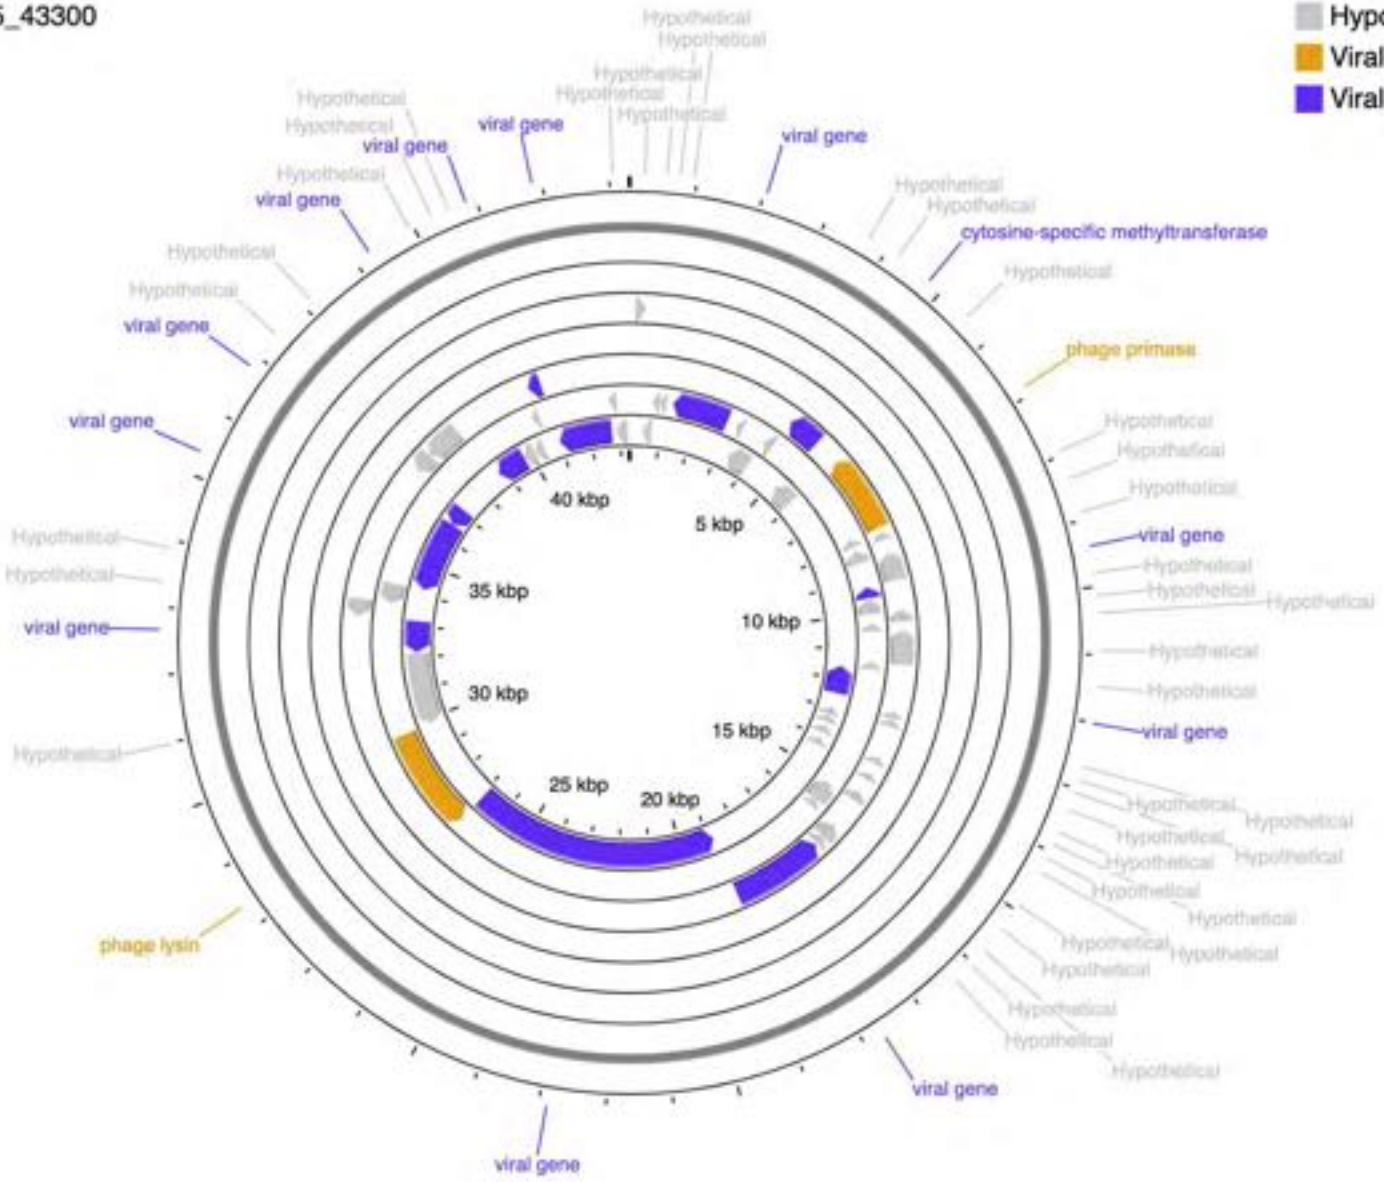

Supplement: mbio.02595-21-sf003.pdf [file mbio.02595-21-sf003.pdf]
