# Supplementary material
Source: PubMed Central journal article supplement (PMC8567247)

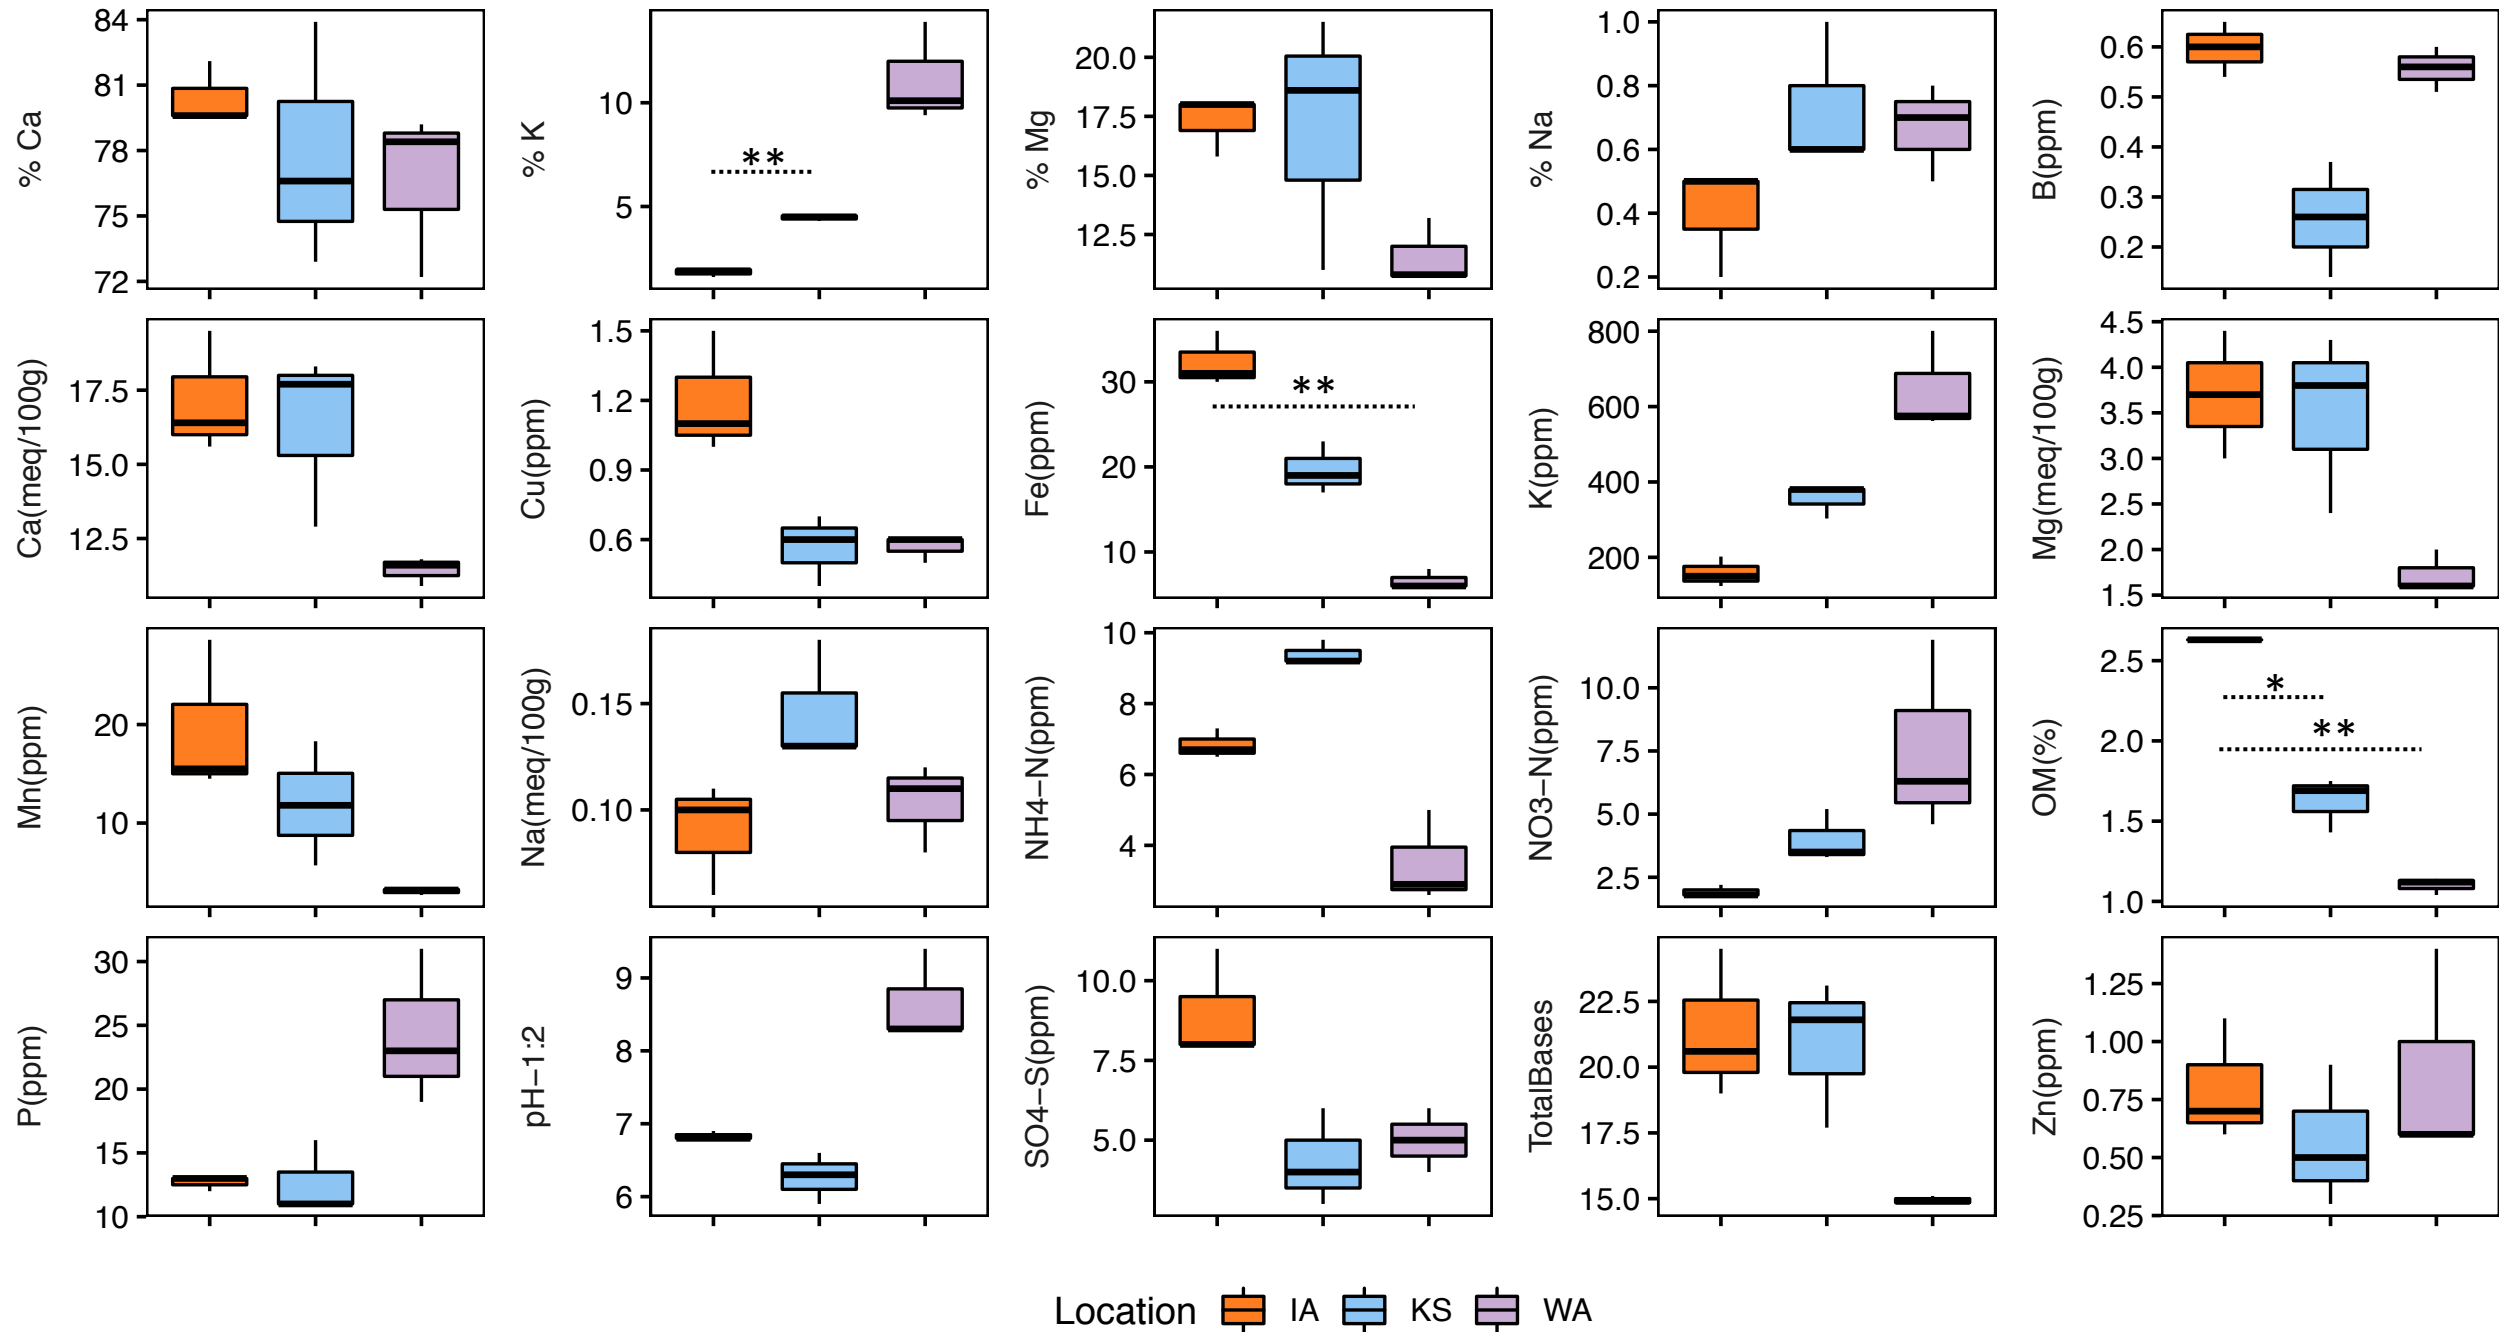

Supplement: mbio.02595-21-sf001.pdf [file mbio.02595-21-sf001.pdf]

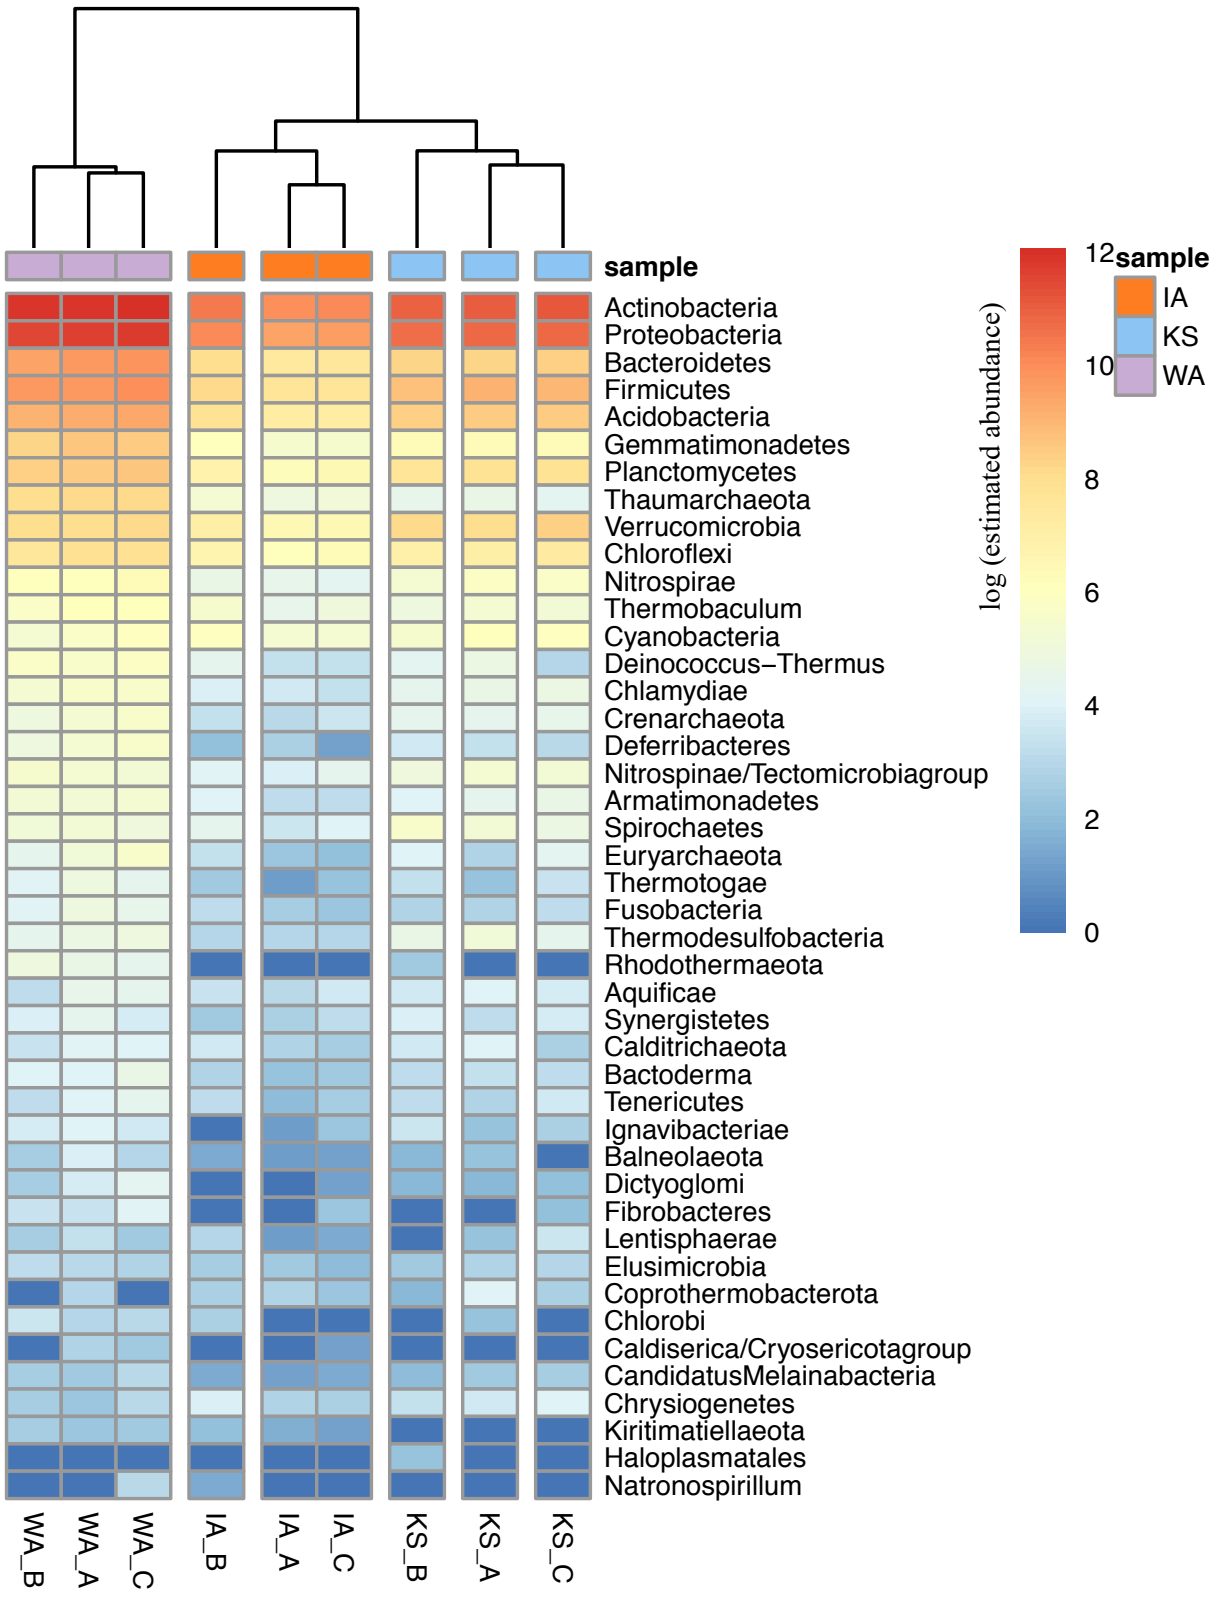

Supplement: mbio.02595-21-sf002.pdf [file mbio.02595-21-sf002.pdf]

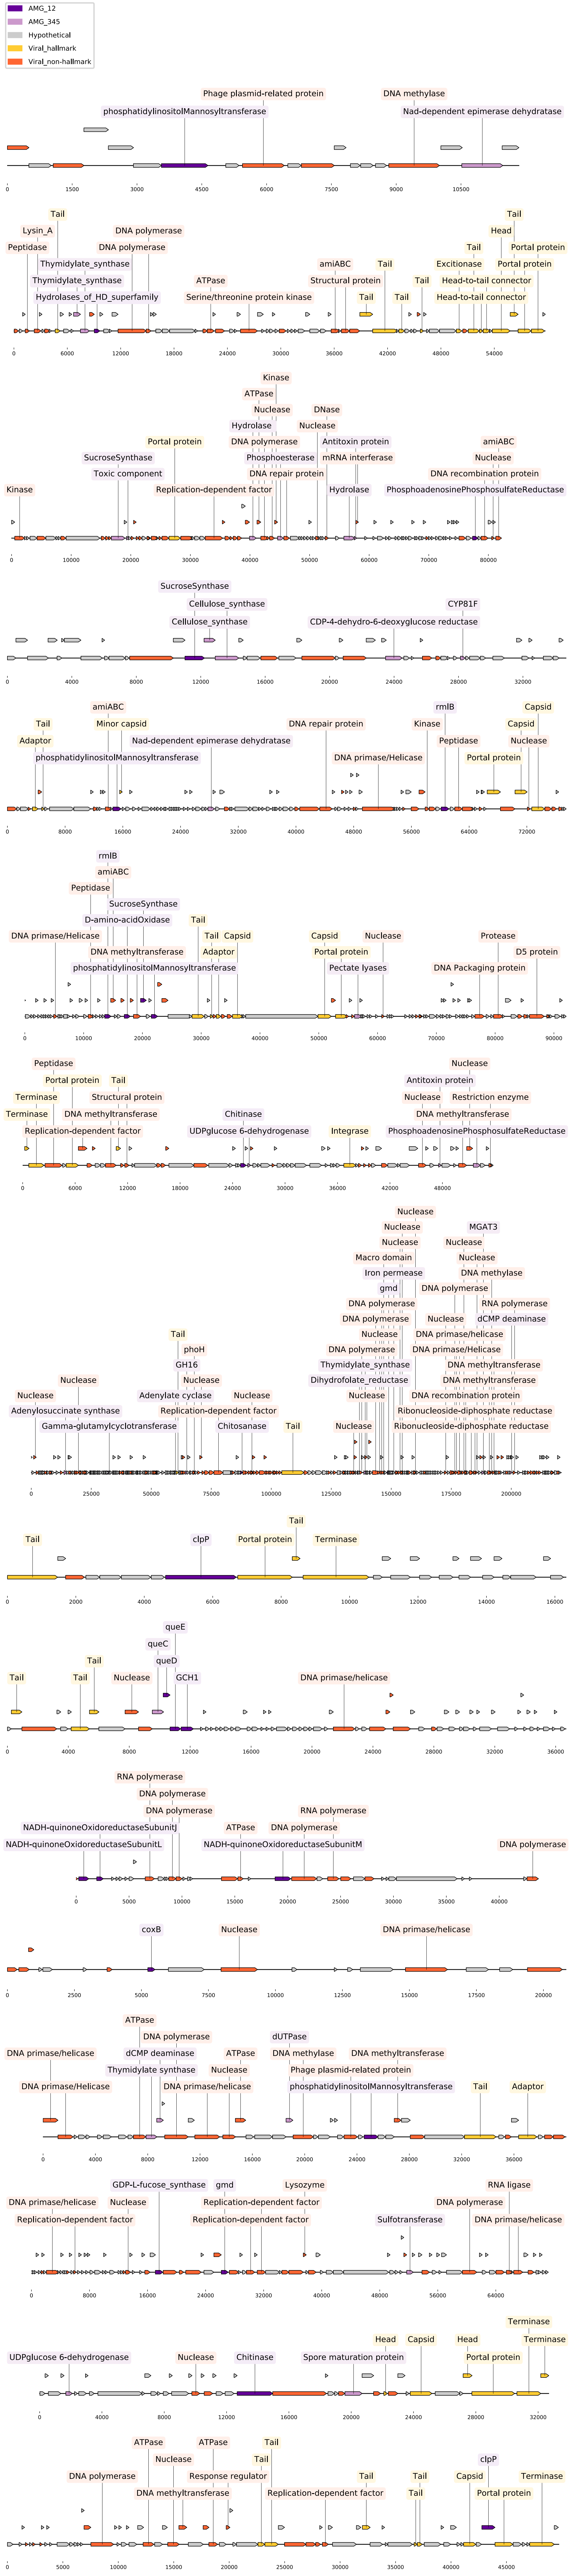

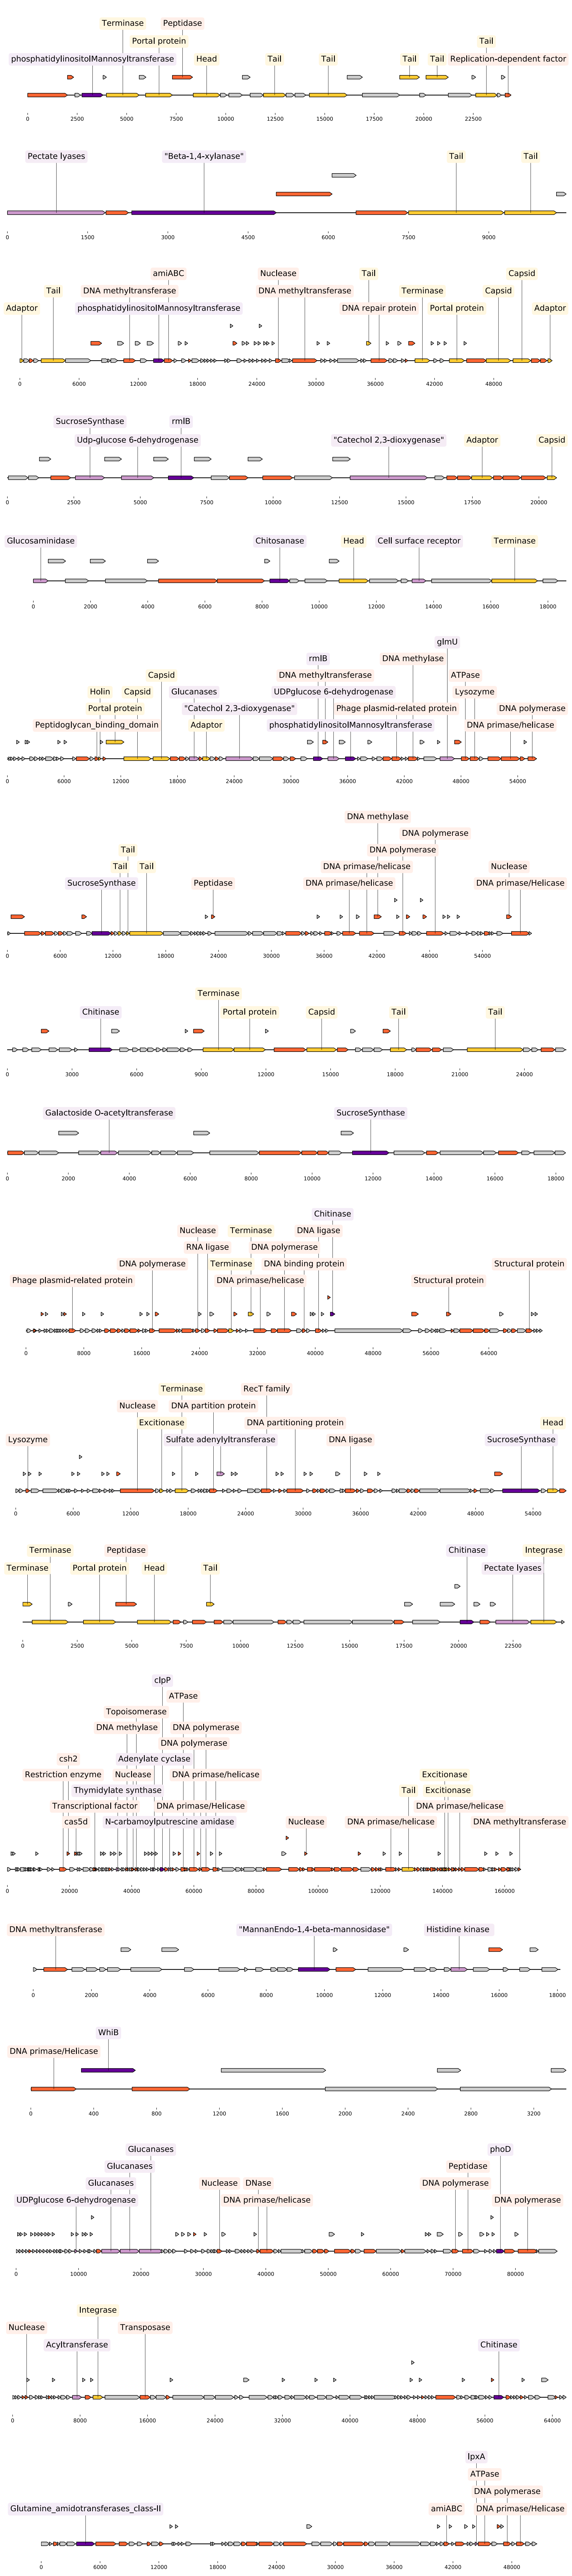

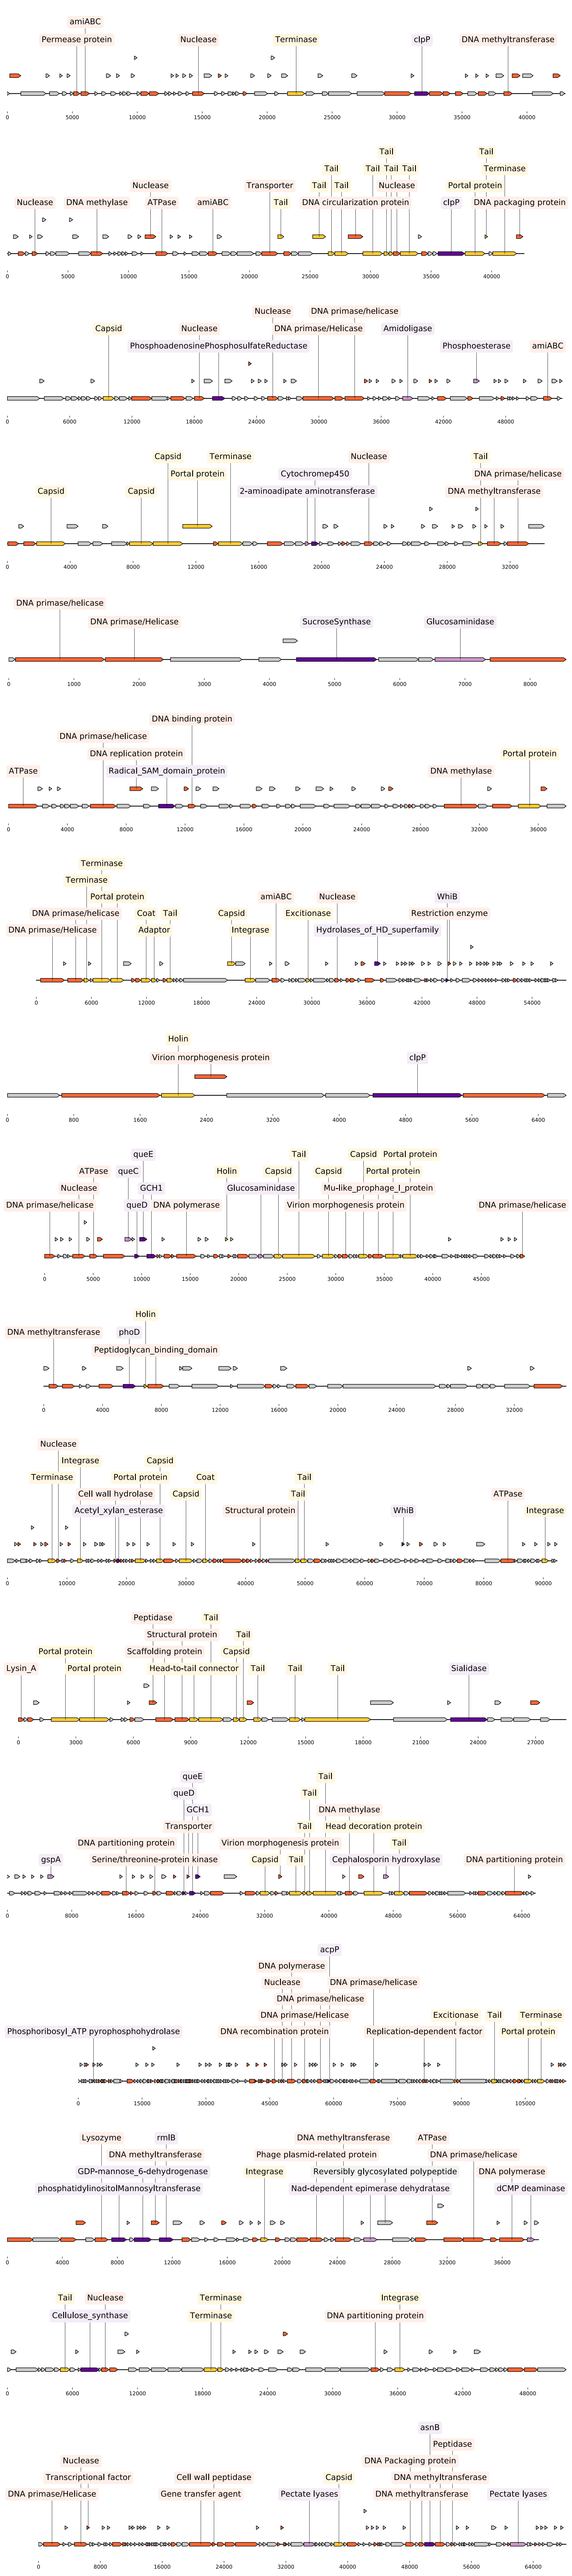

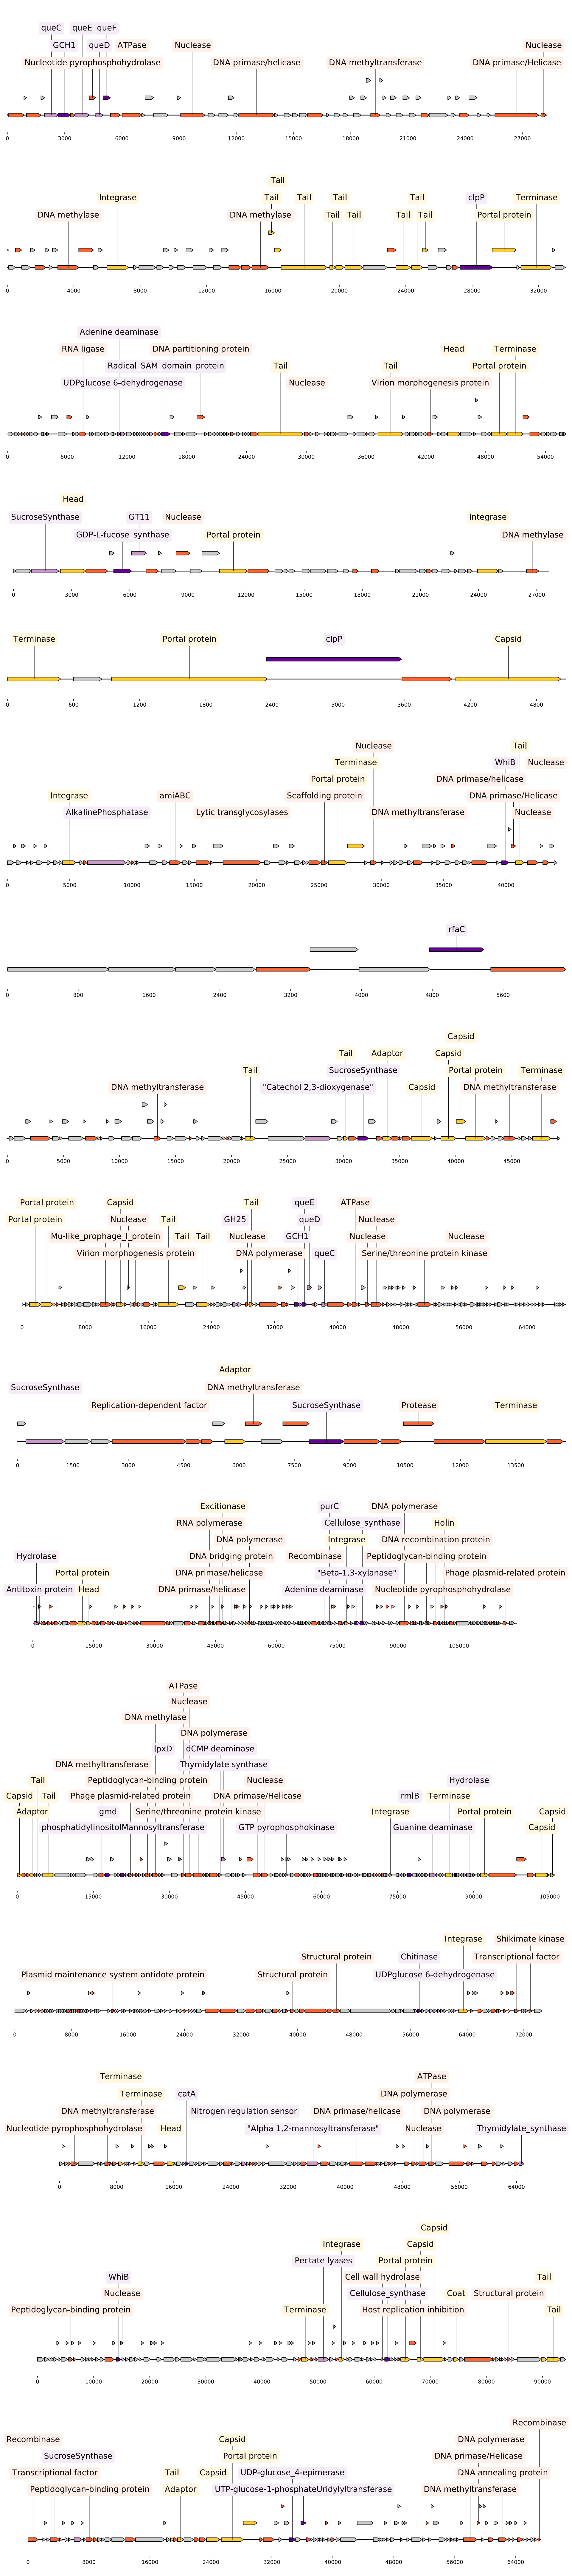

Supplement: mbio.02595-21-sf005.pdf [file mbio.02595-21-sf005.pdf]

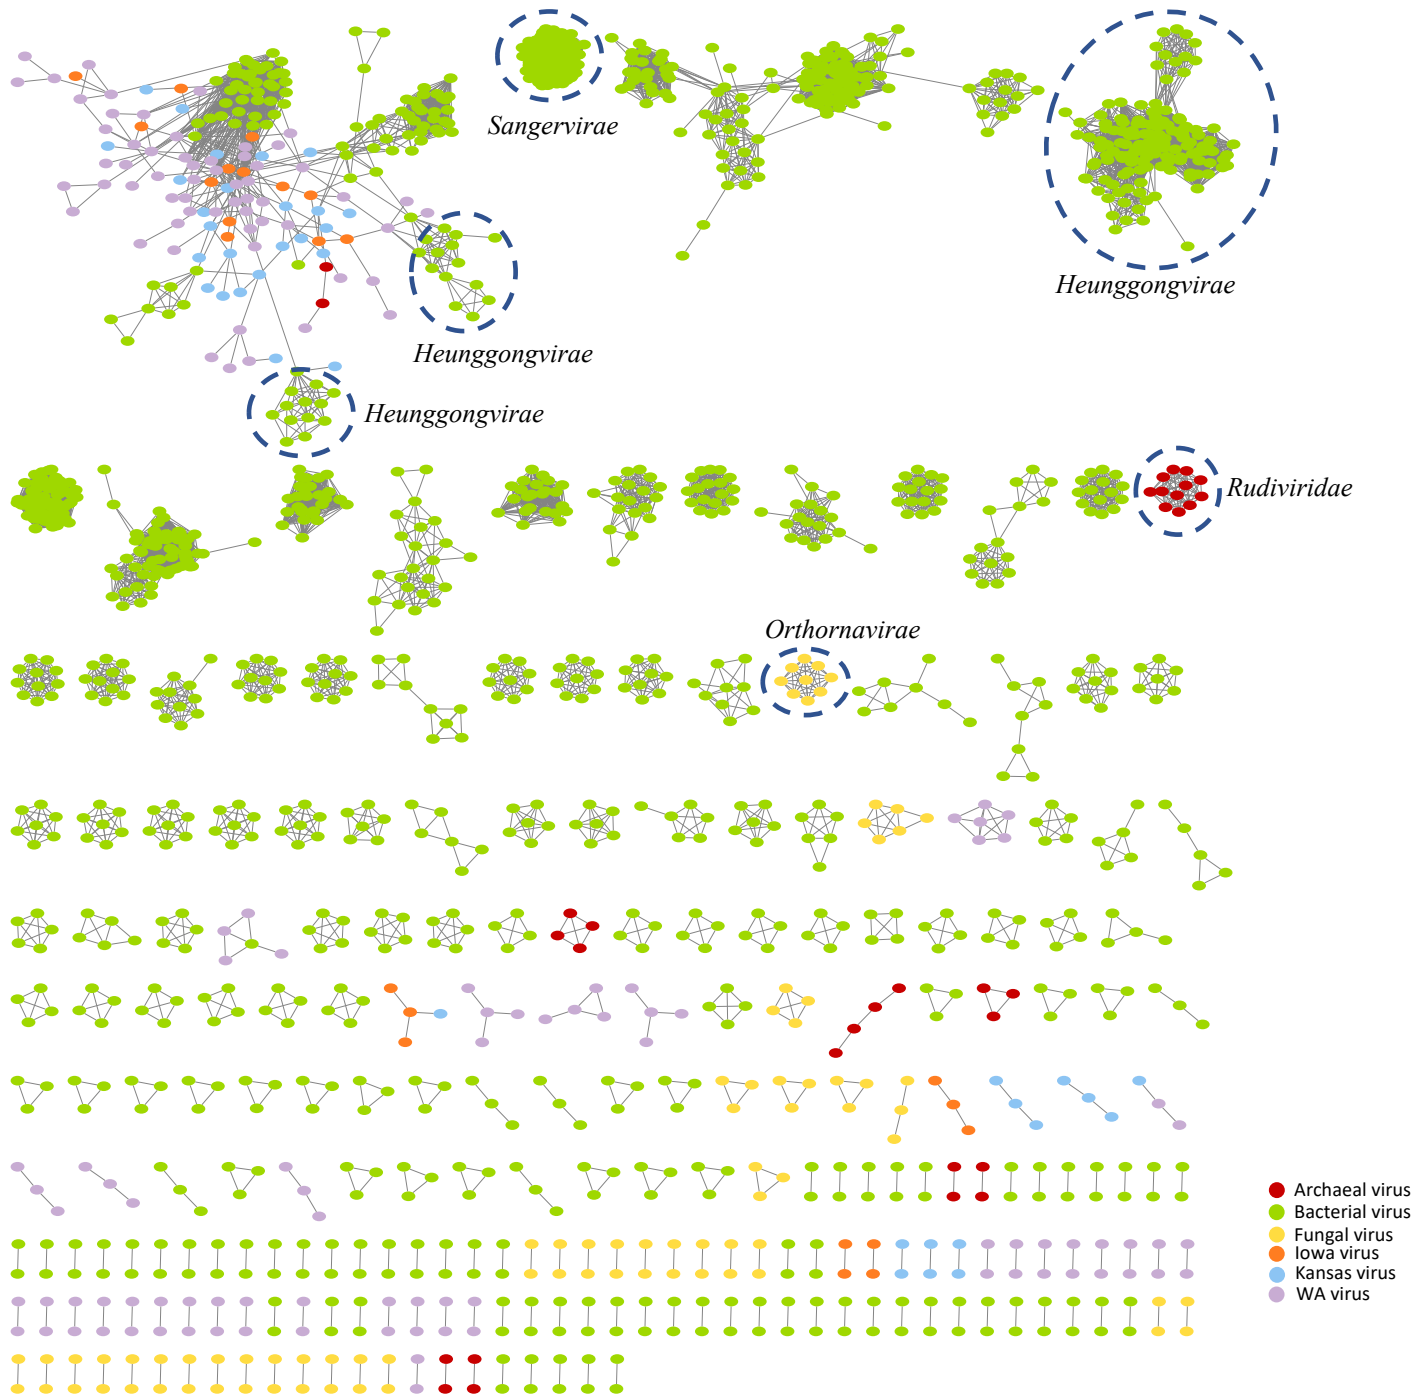

Supplement: mbio.02595-21-sf006.pdf [file mbio.02595-21-sf006.pdf]
